# Supplementary material for: Control of intramolecular singlet fission in a pentacene dimer by hydrostatic pressure
Source: Royal Society of Chemistry journal article supplement (doi:10.1039/d3sc00312d), 2023-01-01
Supplement: d3sc00312d1.pdf [file d3sc00312d1.pdf]

*Electronic Supplementary Information*  
*for*

**Control of intramolecular singlet fission in a pentacene dimer by hydrostatic pressure**

**Tomokazu Kinoshita,<sup>a</sup> Shunta Nakamura,<sup>b</sup> Makoto Harada,<sup>a</sup> Taku Hasobe<sup>\*b</sup> and Gaku Fukuhara<sup>\*a</sup>**

<sup>a</sup> *Department of Chemistry, Tokyo Institute of Technology, 2-12-1 Ookayama, Meguro-ku, Tokyo 152-8551, Japan*

<sup>b</sup> *Department of Chemistry, Faculty of Science and Technology, Keio University, Yokohama, Kanagawa 223-8522, Japan*

E-mail: hasobe@chem.keio.ac.jp (T.H.), gaku@chem.titech.ac.jp (G.F.)

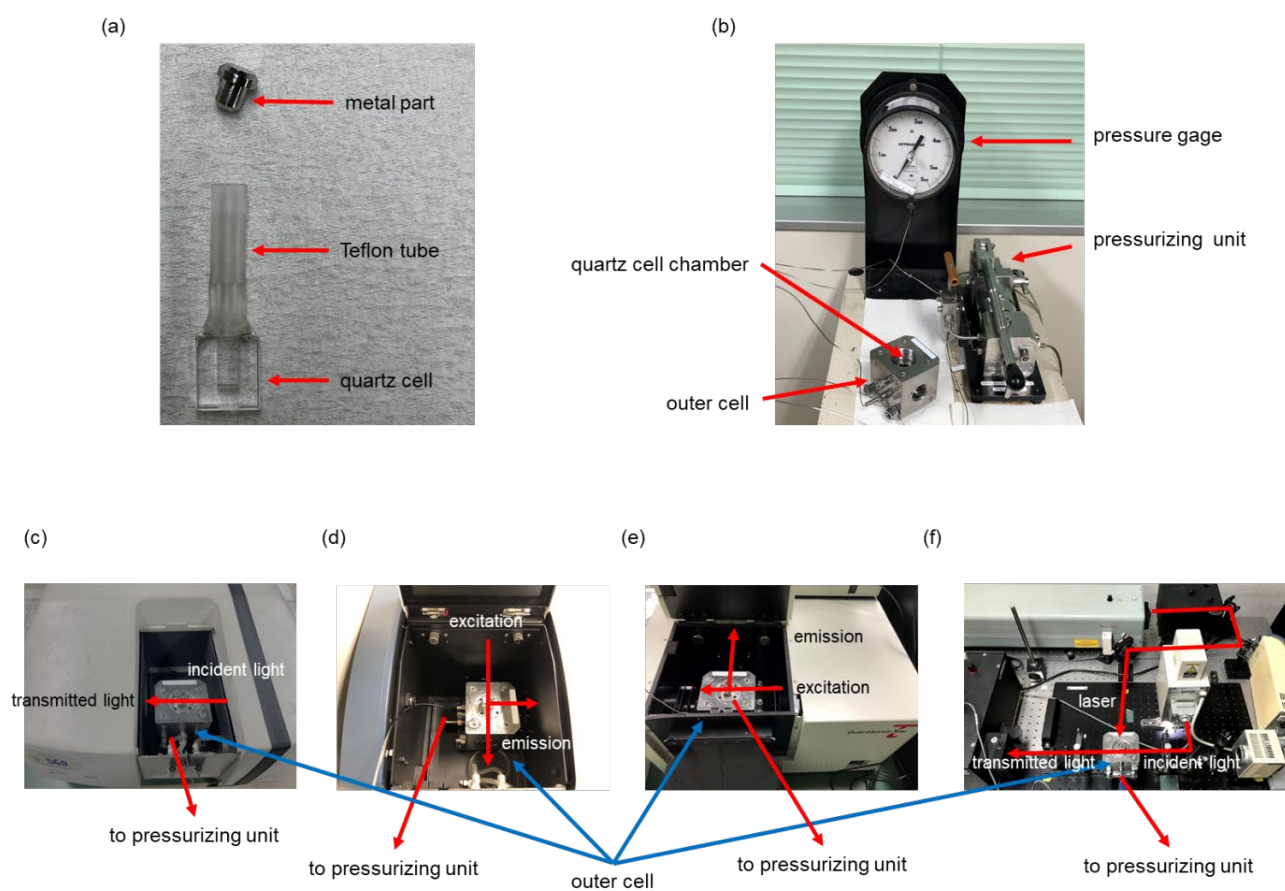

**Figure S1.** Photographs of the (a) inner cell, (b) high-pressurizing unit, and set up for the (c) UV/vis absorption, (d) fluorescence/excitation, (e) time-correlated single-photon counting, and (f) nanosecond transient absorption (nsTA) measurements.

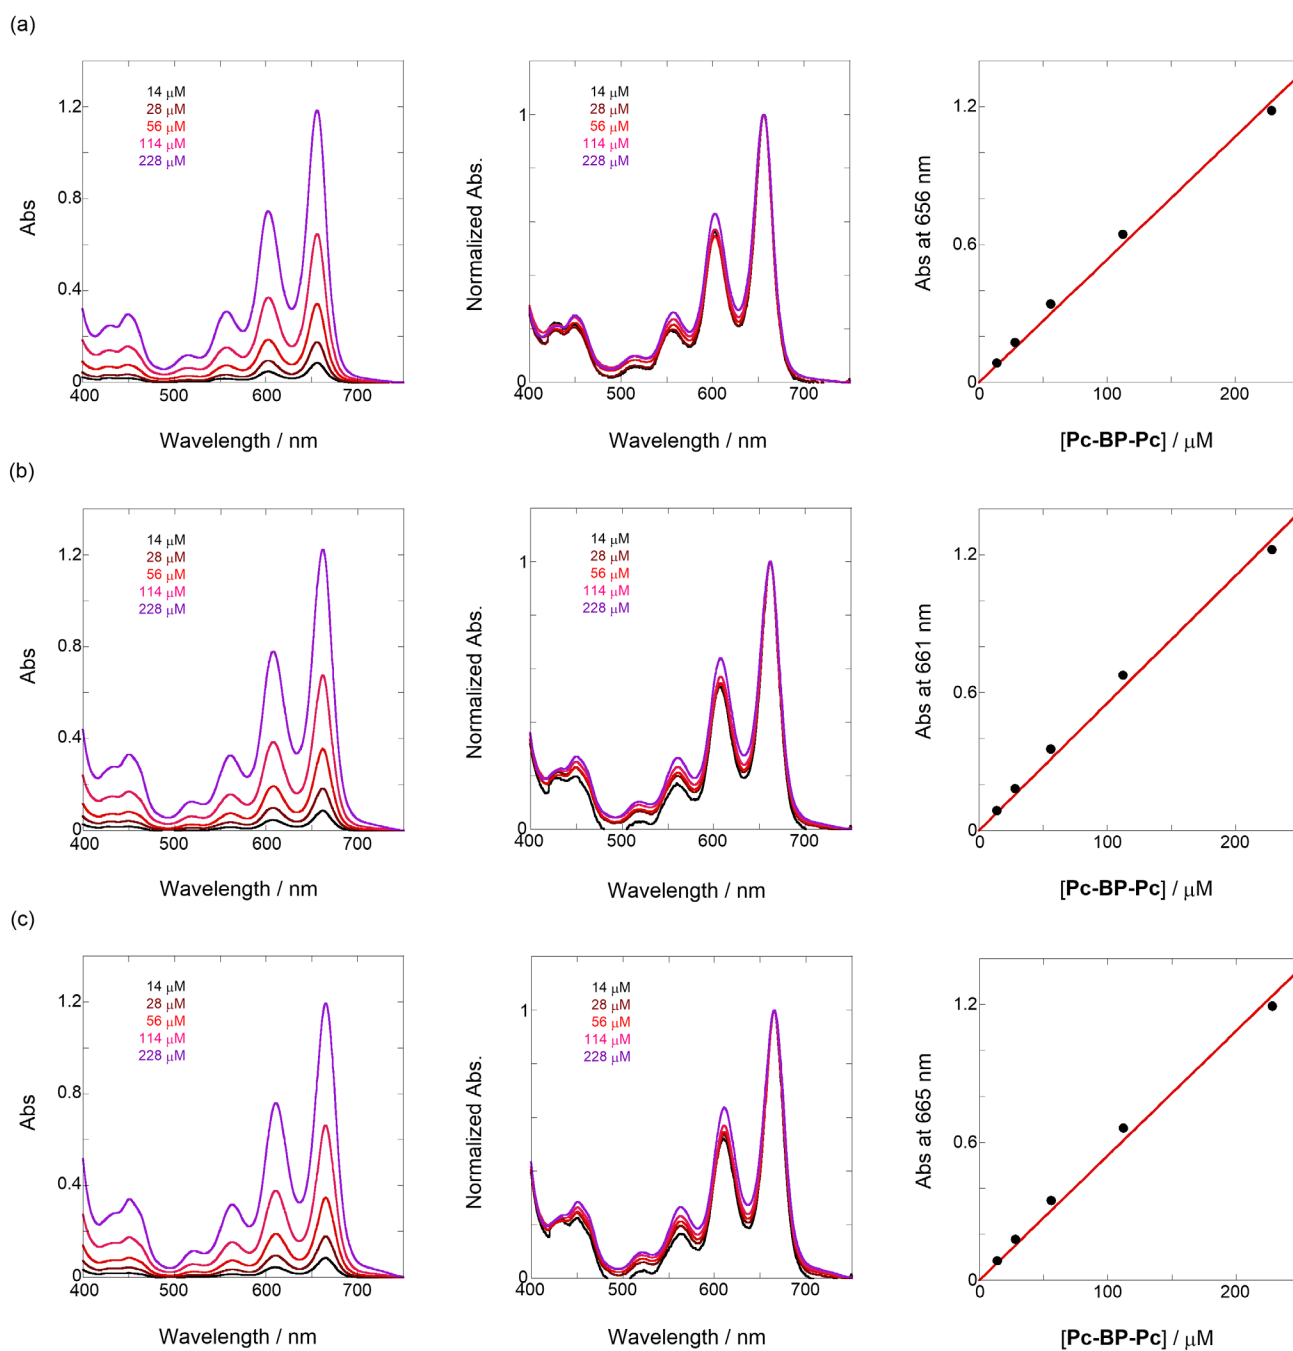

**Figure S2.** Concentration-dependent (14-228  $\mu\text{M}$ , from black to purple) UV/vis spectra (*left*), normalized UV/vis spectra (*center*), and absorbance plots at the 0-0 absorption maxima (*right*) of Pc-BP-Pc at (a) 0.1 MPa (correlation coefficient  $r = 0.996$ ), (b) 160 MPa ( $r = 0.996$ ), and (c) 320 MPa ( $r = 0.995$ ) in toluene at room temperature, measured in a high-pressure cell.

**Table S1. Hydrostatic Pressure-Induced Spectral Shifts of Absorption and Fluorescence Maxima**

| Solvent | Dipole moment / D | Slopes of the absorption 0–0 band/cm <sup>-1</sup> MPa <sup>-1</sup> |               | Slopes of the fluorescence 0–0 band/cm <sup>-1</sup> MPa <sup>-1</sup> |               |
|---------|-------------------|----------------------------------------------------------------------|---------------|------------------------------------------------------------------------|---------------|
|         |                   | <b>Pc-BP-Pc</b>                                                      | <b>Pc-ref</b> | <b>Pc-BP-Pc</b>                                                        | <b>Pc-ref</b> |
| MCH     | 0.00              | -0.660                                                               | -0.727        | -0.588                                                                 | -0.755        |
| Toluene | 0.38              | -0.750                                                               | -0.848        | -0.856                                                                 | -0.891        |
| THF     | 1.75              | -0.636                                                               | <i>a</i>      | -0.729                                                                 | <i>a</i>      |

<sup>a</sup>Not determined.

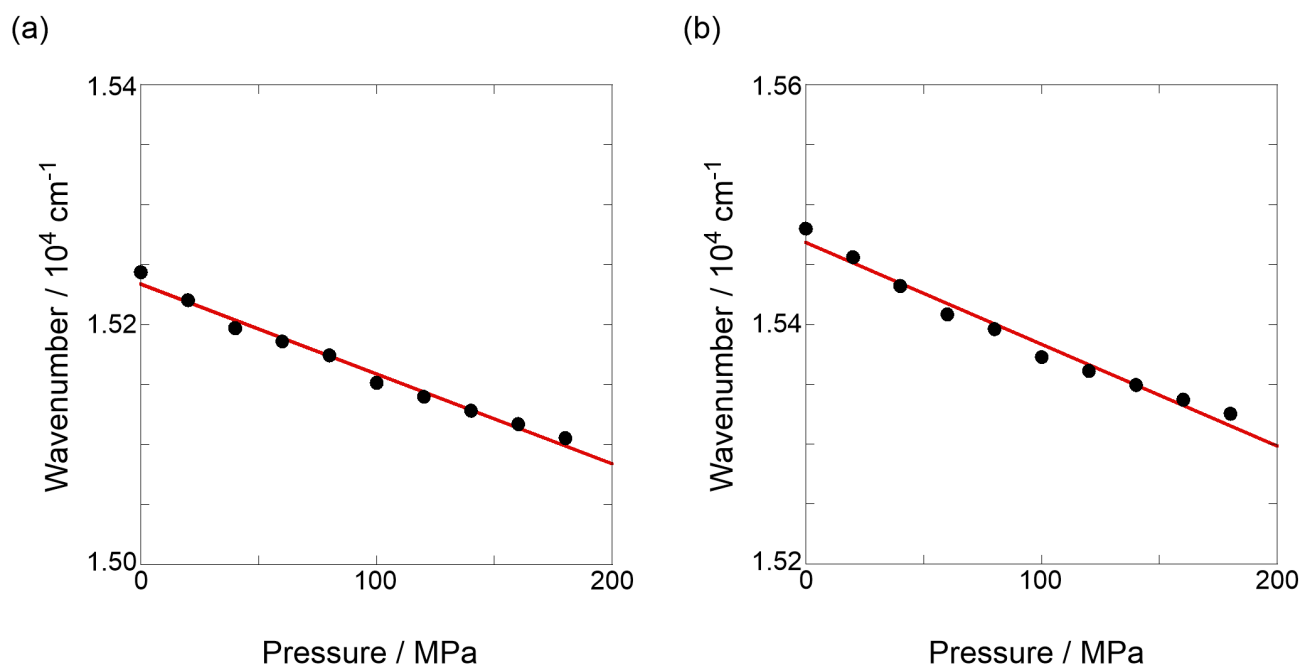

**Figure S3.** Plots of wavenumber of the absorption maxima at the 0–0 band of (a) **Pc-BP-Pc** (82 μM) ( $r = 0.993$ , slope =  $-0.750 \text{ cm}^{-1} \text{ MPa}^{-1}$ ) and (b) **Pc-ref** (91 μM) ( $r = 0.989$ , slope =  $-0.848 \text{ cm}^{-1} \text{ MPa}^{-1}$ ) in toluene at room temperature at 0.1, 20, 40, 60, 80, 100, 120, 140, 160, and 180 MPa, measured in a high-pressure cell.



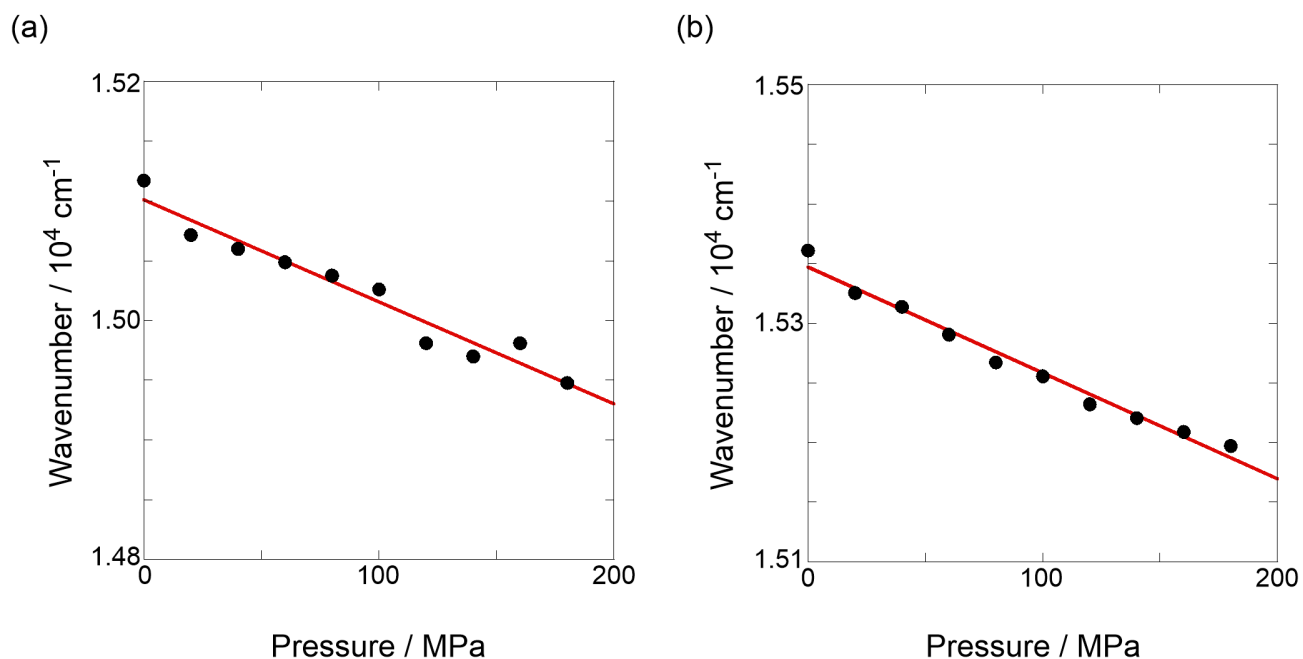

**Figure S4.** Plots of wavenumber of the fluorescence maxima at the 0–0 band of (a) **Pc-BP-Pc** (67  $\mu\text{M}$ ) ( $\lambda_{\text{ex}} = 580$  nm,  $r = 0.974$ , slope =  $-0.856 \text{ cm}^{-1} \text{ MPa}^{-1}$ ) and (b) **Pc-ref** (91  $\mu\text{M}$ ) ( $\lambda_{\text{ex}} = 543$  nm,  $r = 0.990$ , slope =  $-0.891 \text{ cm}^{-1} \text{ MPa}^{-1}$ ) in toluene at room temperature at 0.1, 20, 40, 60, 80, 100, 120, 140, 160, and 180 MPa, measured in a high-pressure cell.

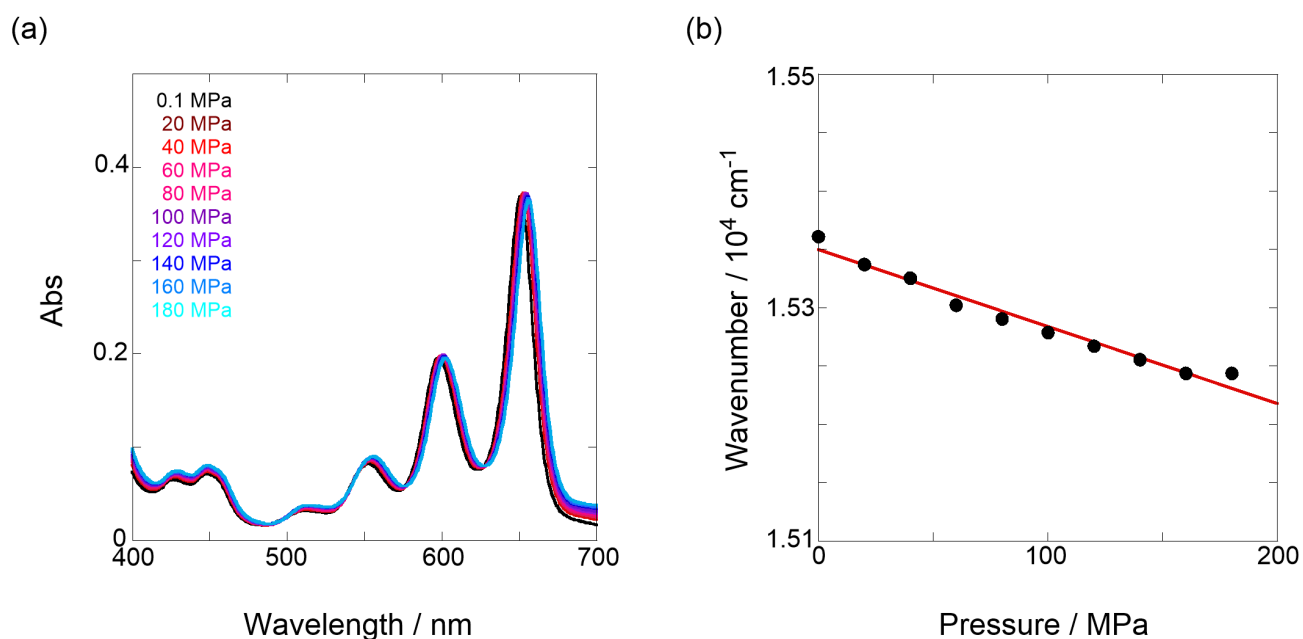

**Figure S5.** (a) Pressure-dependent UV/vis spectra and (b) plot of wavenumber of the absorption maxima at the 0–0 band of **Pc-BP-Pc** (91  $\mu\text{M}$ ) ( $r = 0.985$ , slope =  $-0.660 \text{ cm}^{-1} \text{ MPa}^{-1}$ ) in MCH at room temperature at 0.1, 20, 40, 60, 80, 100, 120, 140, 160, and 180 MPa (from black to sky blue), measured in a high-pressure cell.

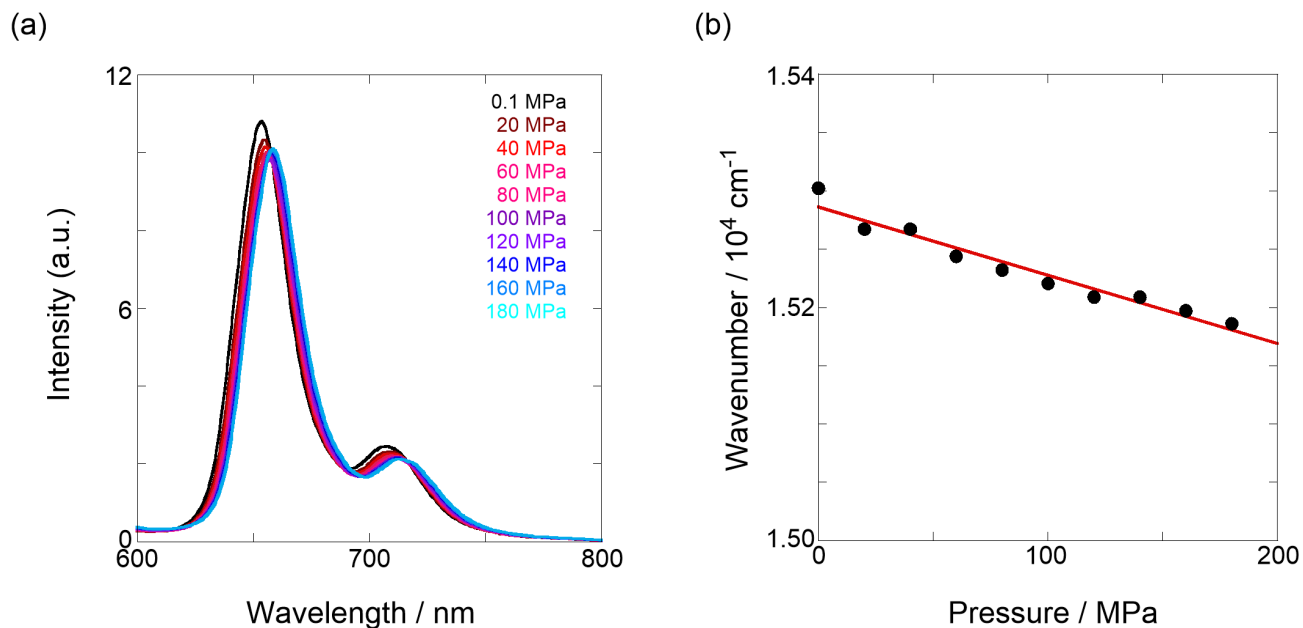

**Figure S6.** (a) Pressure-dependent fluorescence spectra and (b) plot of wavenumber of the fluorescence maxima at the 0–0 band of **Pc-BP-Pc** (87  $\mu\text{M}$ ) ( $\lambda_{\text{ex}} = 576 \text{ nm}$ ,  $r = 0.975$ , slope =  $-0.588 \text{ cm}^{-1} \text{ MPa}^{-1}$ ) in MCH at room temperature at 0.1, 20, 40, 60, 80, 100, 120, 140, 160, and 180 MPa (from black to sky blue), measured in a high-pressure cell.

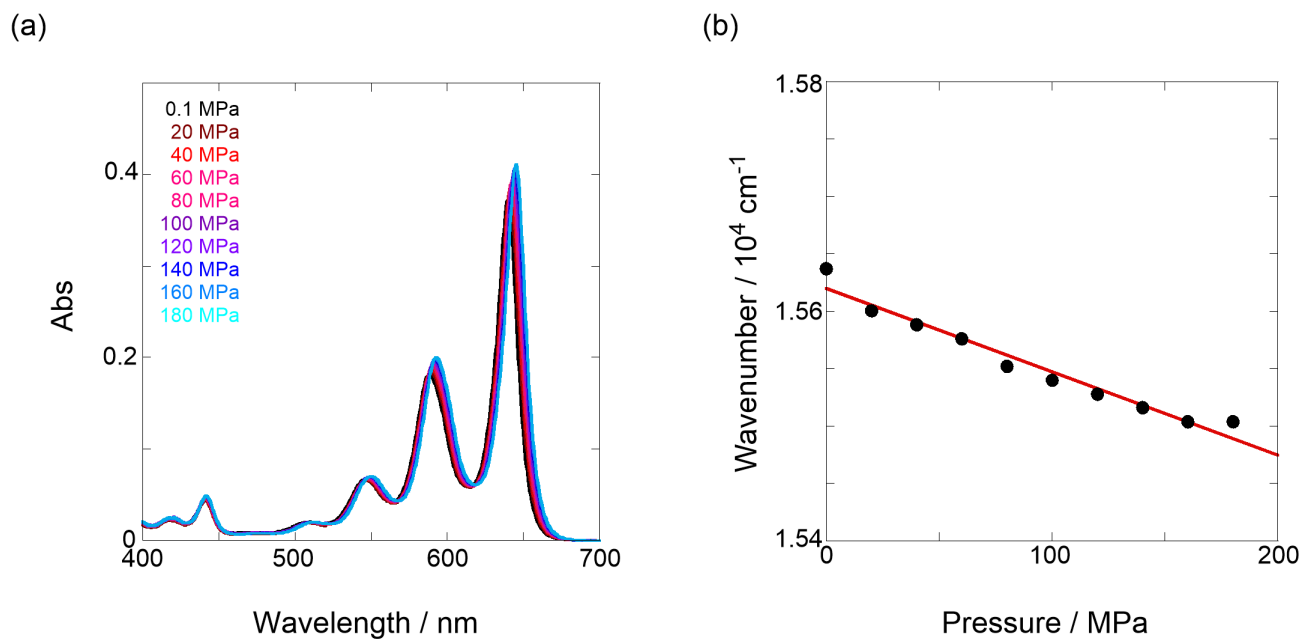

**Figure S7.** (a) Pressure-dependent UV/vis spectra and (b) plot of wavenumber of the absorption maxima at the 0–0 band of **Pc-ref** (111  $\mu\text{M}$ ) ( $r = 0.980$ , slope =  $-0.727 \text{ cm}^{-1} \text{ MPa}^{-1}$ ) in MCH at room temperature at 0.1, 20, 40, 60, 80, 100, 120, 140, 160, and 180 MPa (from black to sky blue), measured in a high-pressure cell.

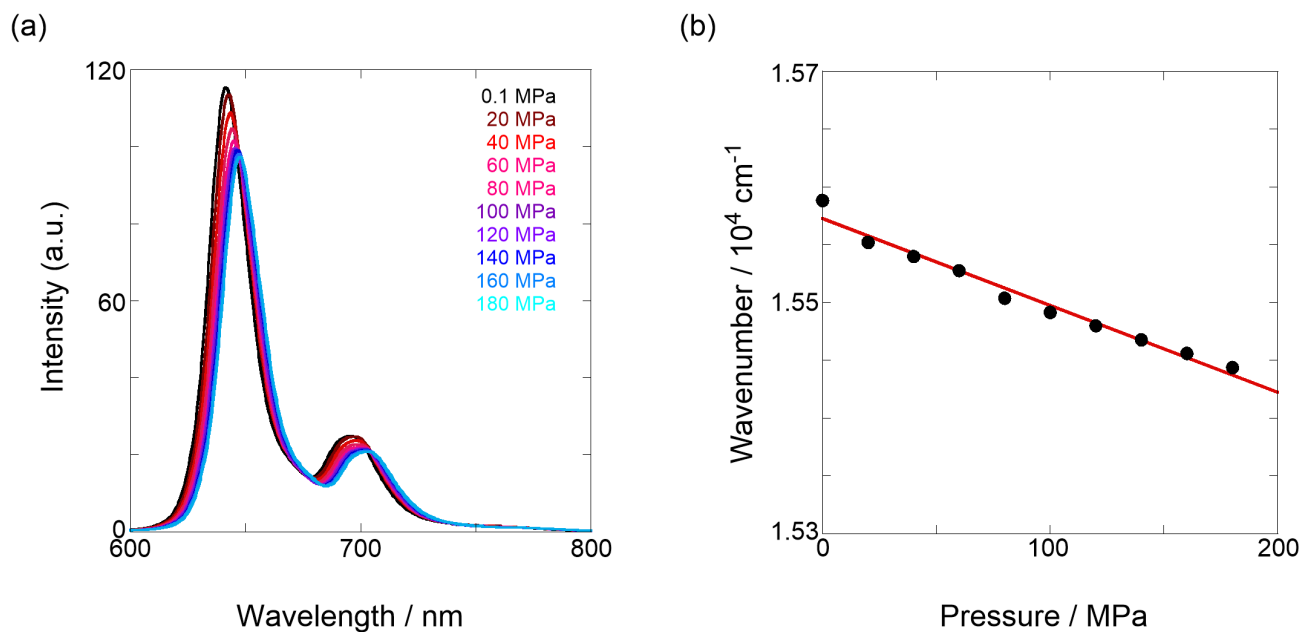

**Figure S8.** (a) Pressure-dependent fluorescence spectra and (b) plot of wavenumber of the fluorescence maxima at the 0–0 band of **Pc-ref** (111  $\mu\text{M}$ ) ( $\lambda_{\text{ex}} = 568 \text{ nm}$ ,  $r = 0.988$ , slope =  $-0.755 \text{ cm}^{-1} \text{ MPa}^{-1}$ ) in MCH at room temperature at 0.1, 20, 40, 60, 80, 100, 120, 140, 160, and 180 MPa (from black to sky blue), measured in a high-pressure cell.

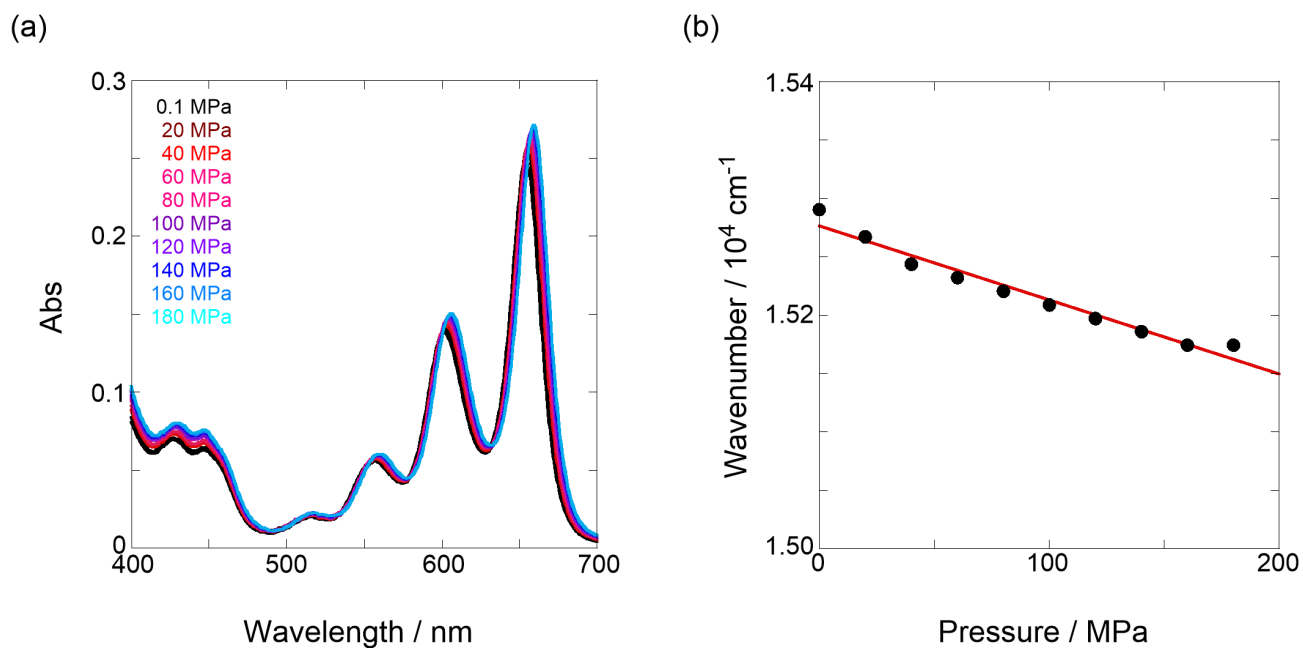

**Figure S9.** (a) Pressure-dependent UV/vis spectra and (b) plot of wavenumber of the absorption maxima at the 0–0 band of **Pc-BP-Pc** (77  $\mu\text{M}$ ) ( $r = 0.982$ , slope =  $-0.636 \text{ cm}^{-1} \text{ MPa}^{-1}$ ) in THF at room temperature at 0.1, 20, 40, 60, 80, 100, 120, 140, 160, and 180 MPa (from black to sky blue), measured in a high-pressure cell.

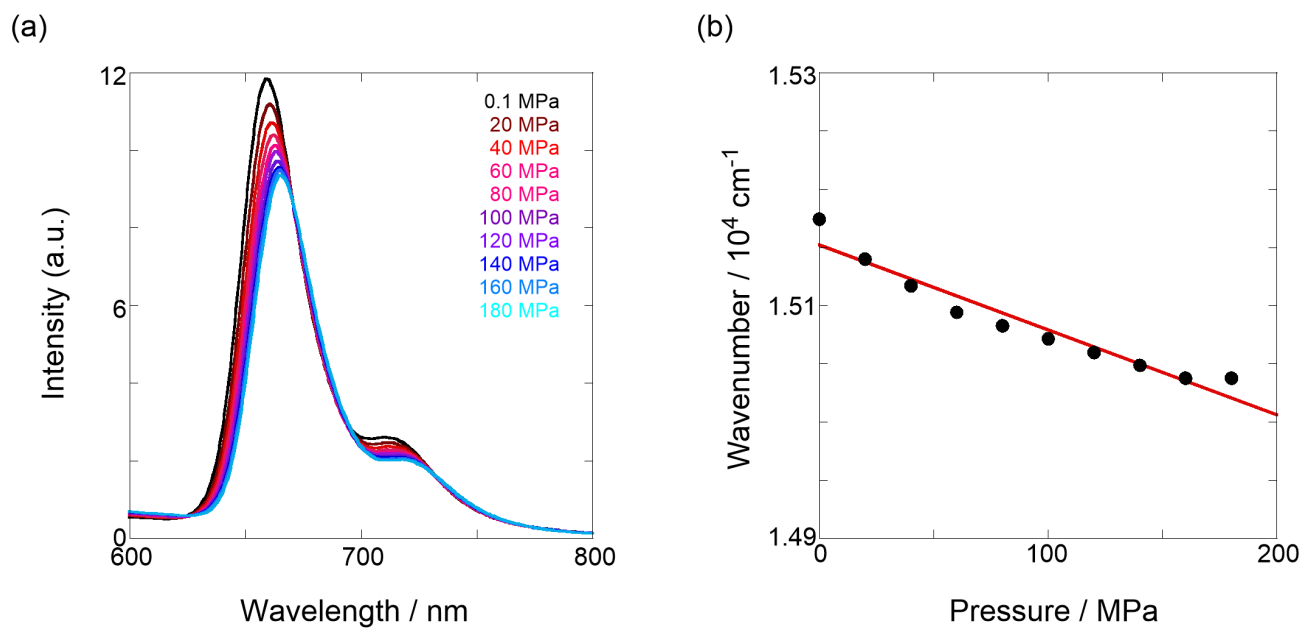

**Figure S10.** (a) Pressure-dependent fluorescence spectra and (b) plot of wavenumber of the fluorescence maxima at the 0–0 band of **Pc-BP-Pc** (77  $\mu\text{M}$ ) ( $\lambda_{\text{ex}} = 580 \text{ nm}$ ,  $r = 0.967$ , slope =  $-0.729 \text{ cm}^{-1} \text{ MPa}^{-1}$ ) in THF at room temperature at 0.1, 20, 40, 60, 80, 100, 120, 140, 160, and 180 MPa (from black to sky blue), measured in a high-pressure cell.

**Table S2. Fluorescence Lifetimes of Pc-BP-Pc and Pc-ref in Toluene under Hydrostatic Pressure<sup>a</sup>**

| Sample                       | $\lambda_{em}^b/nm$ | Pressure/MPa | $\tau_1/ns$ | $\tau_1 / \%$ | $\tau_2/ns$ | $\tau_2 / \%$ | $\chi^2$ |
|------------------------------|---------------------|--------------|-------------|---------------|-------------|---------------|----------|
| <b>Pc-BP-Pc</b> (74 $\mu$ M) | 660                 | 0.1          | 14.8        | 0.70          | 0.6         | 0.30          | 1.1      |
|                              |                     | 20           | 14.6        | 0.72          | 0.7         | 0.28          | 1.2      |
|                              |                     | 40           | 14.6        | 0.67          | 0.6         | 0.33          | 1.3      |
|                              |                     | 60           | 14.5        | 0.66          | 0.5         | 0.34          | 1.1      |
|                              |                     | 80           | 14.4        | 0.65          | 0.5         | 0.35          | 1.1      |
|                              |                     | 100          | 14.3        | 0.65          | 0.6         | 0.35          | 1.2      |
|                              |                     | 120          | 14.3        | 0.62          | 0.5         | 0.38          | 1.2      |
|                              |                     | 140          | 14.3        | 0.61          | 0.5         | 0.39          | 1.2      |
|                              |                     | 160          | 14.1        | 0.61          | 0.6         | 0.39          | 1.2      |
|                              |                     | 180          | 14.0        | 0.59          | 0.5         | 0.41          | 1.2      |
| <b>Pc-ref</b> (89 $\mu$ M)   | 650                 | 0.1          | 12.9        | 1.00          |             |               | 1.1      |
|                              |                     | 20           | 12.8        | 1.00          |             |               | 1.2      |
|                              |                     | 40           | 12.7        | 1.00          |             |               | 1.2      |
|                              |                     | 60           | 12.7        | 1.00          |             |               | 1.3      |
|                              |                     | 80           | 12.7        | 1.00          |             |               | 1.2      |
|                              |                     | 100          | 12.8        | 1.00          |             |               | 1.2      |
|                              |                     | 120          | 12.7        | 1.00          |             |               | 1.1      |
|                              |                     | 140          | 12.8        | 1.00          |             |               | 1.1      |
|                              |                     | 160          | 12.7        | 1.00          |             |               | 1.1      |
|                              |                     | 180          | 12.7        | 1.00          |             |               | 1.1      |

<sup>a</sup>Fluorescence lifetime ( $\tau$ ) and population (%) of each component, determined by the hydrostatic pressure single photon counting method in degassed solution at room temperature;  $\lambda_{ex} = 405$  nm. <sup>b</sup>Monitoring wavelength.

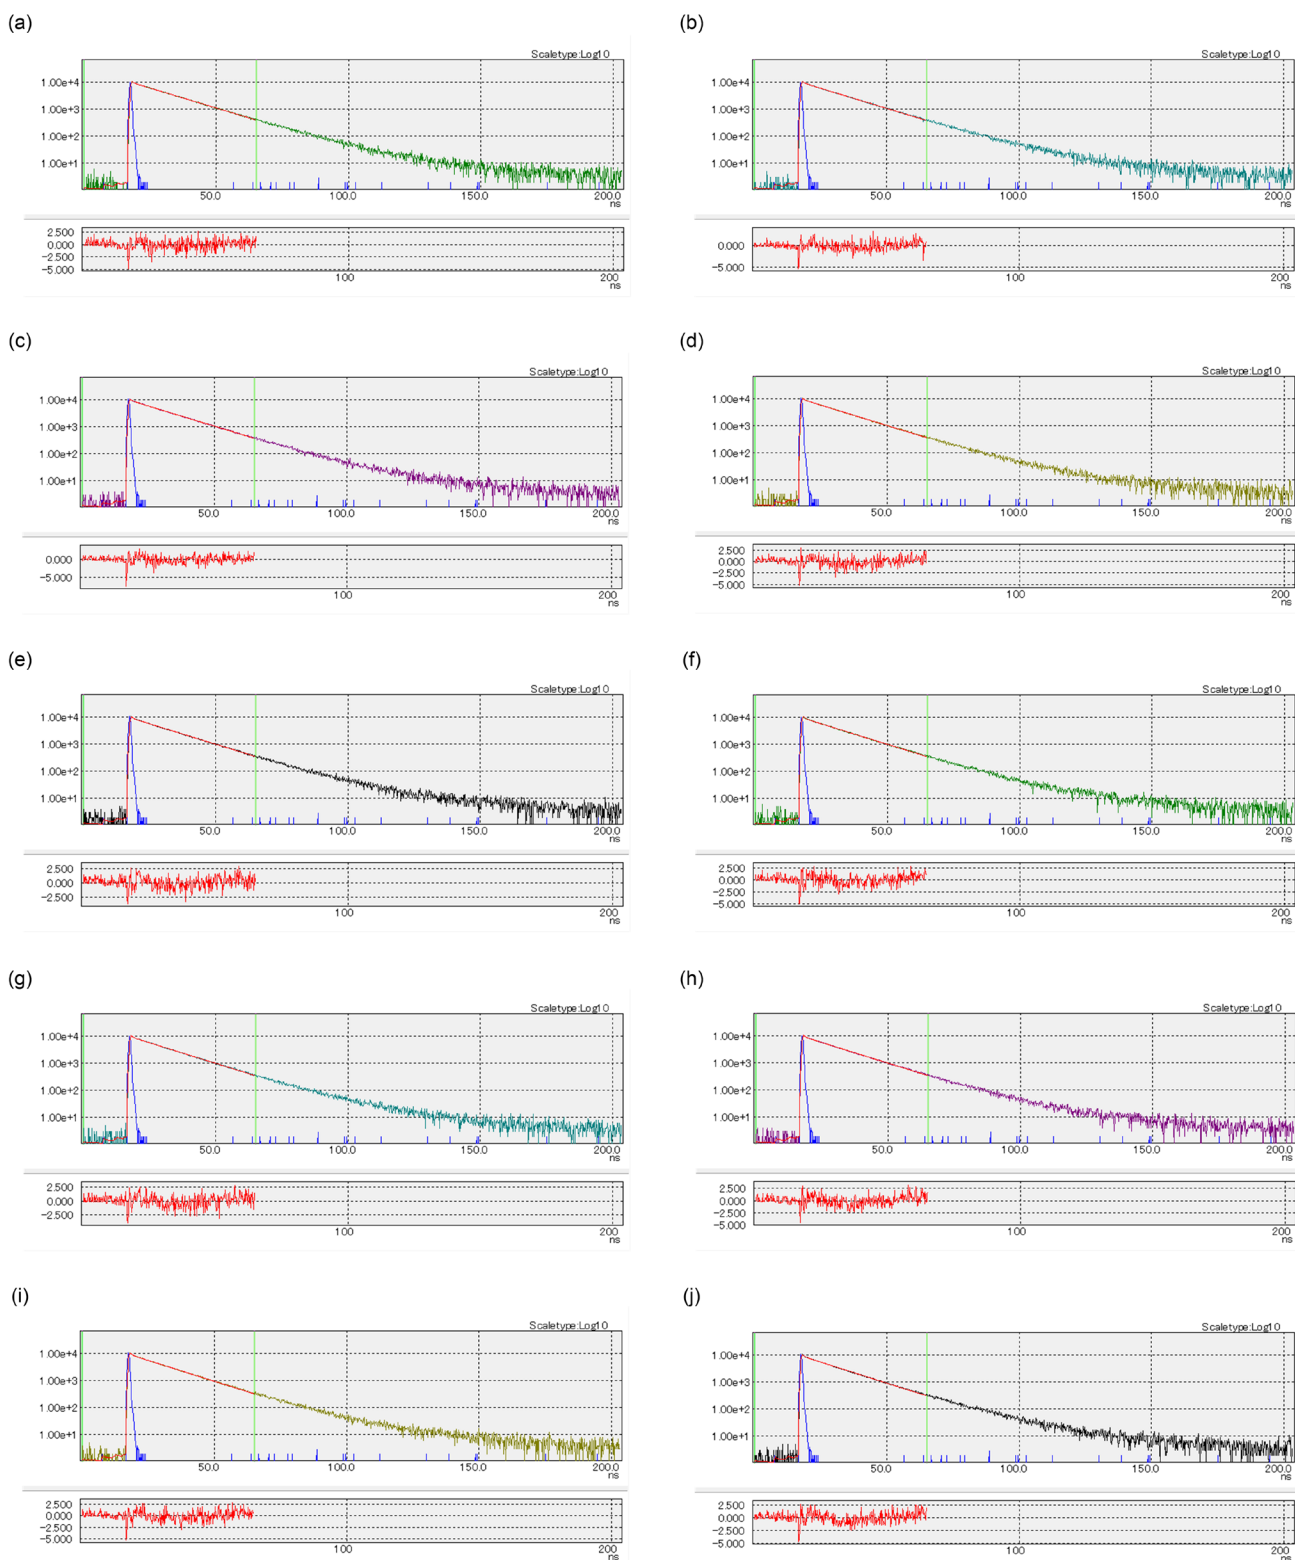

**Figure S11.** Time-correlated fluorescence decays of **Pc-BP-Pc** ( $74 \mu\text{M}$ ) monitored at  $660 \text{ nm}$  at (a)  $0.1$ , (b)  $20$ , (c)  $40$ , (d)  $60$ , (e)  $80$ , (f)  $100$ , (g)  $120$ , (h)  $140$ , (i)  $160$ , and (j)  $180 \text{ MPa}$  in toluene at room temperature, measured in a high-pressure cell, where the colored, red, and blue lines represent the fluorescence decay, fitting result, and the instrument response function, respectively.

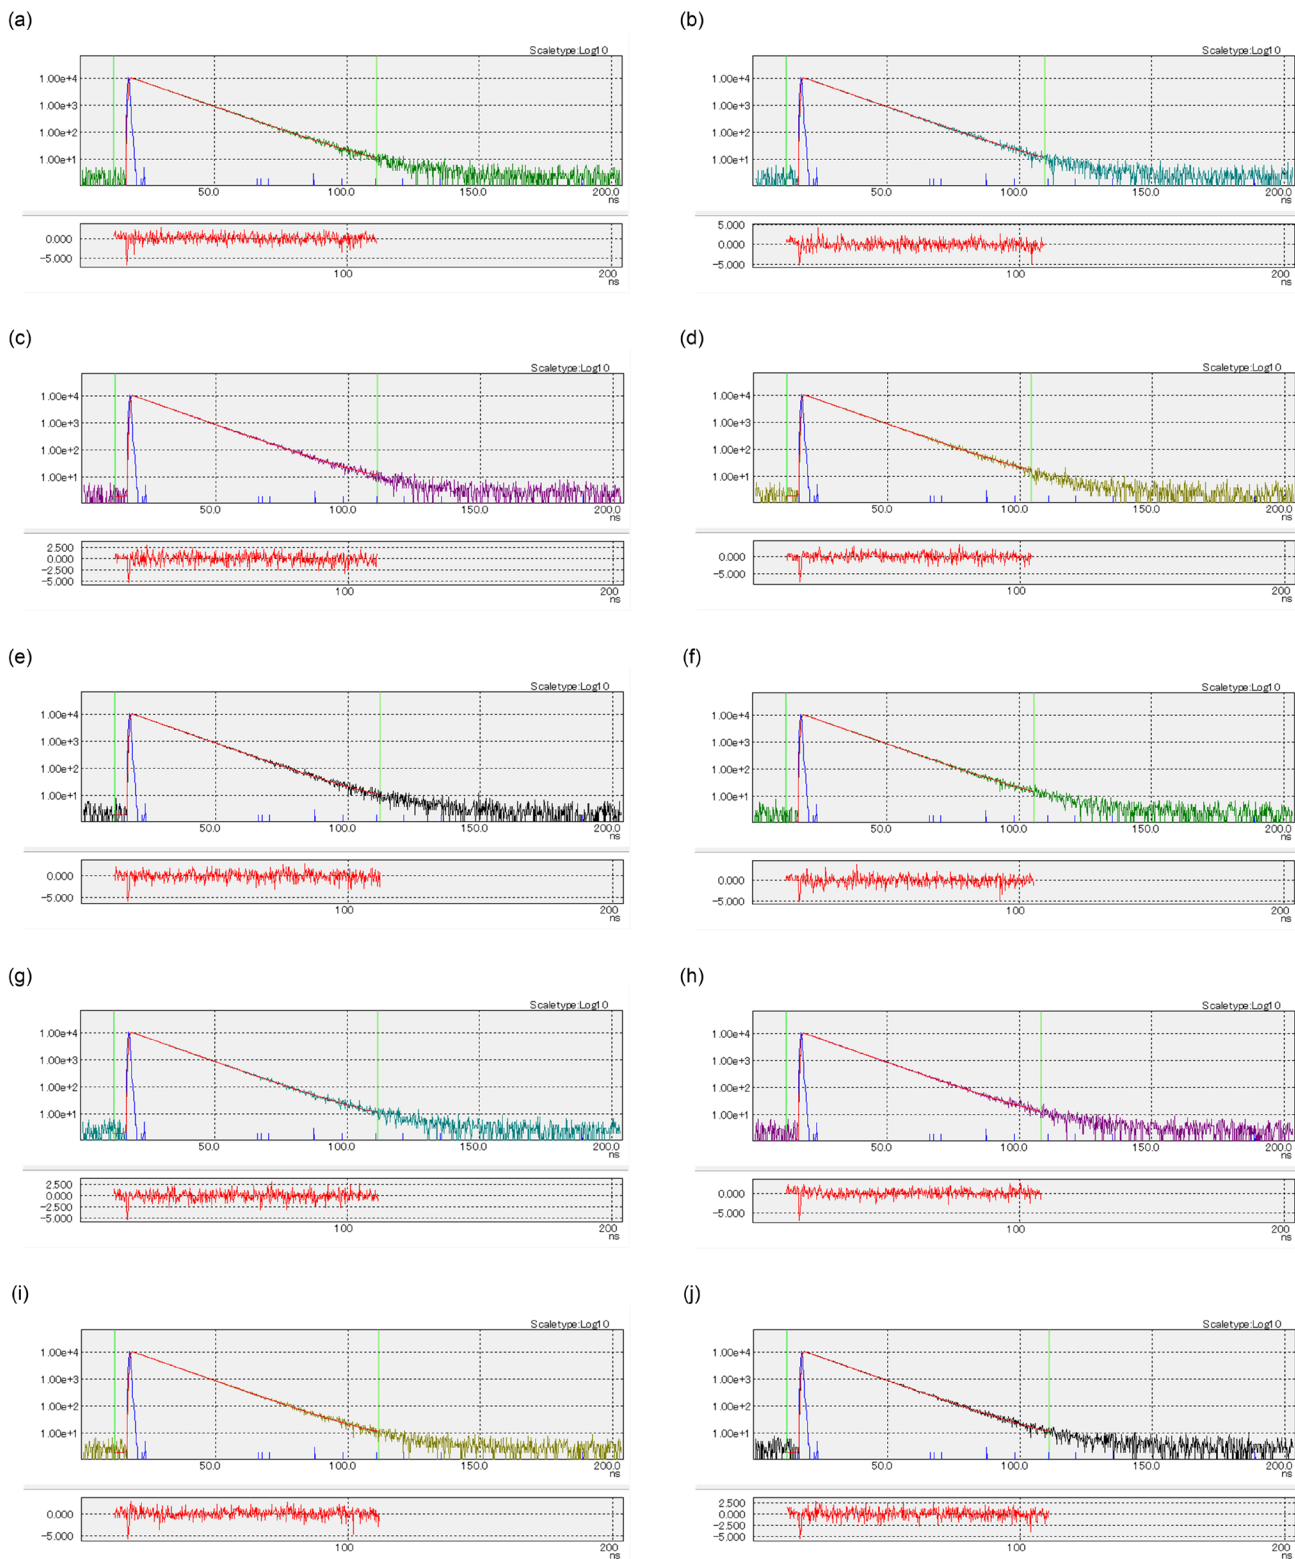

**Figure S12.** Time-correlated fluorescence decays of **Pc-ref** (89  $\mu\text{M}$ ) monitored at 650 nm at (a) 0.1, (b) 20, (c) 40, (d) 60, (e) 80, (f) 100, (g) 120, (h) 140, (i) 160, and (j) 180 MPa in toluene at room temperature, measured in a high-pressure cell, where the colored, red, and blue lines represent the fluorescence decay, fitting result, and the instrument response function, respectively.

**Table S3. Fluorescence Lifetimes of Pc-BP-Pc and Pc-ref in MCH under Hydrostatic Pressure<sup>a</sup>**

| Sample                       | $\lambda_{em}^b/nm$ | Pressure/MPa | $\tau_1/ns$ | $\tau_1 / \%$ | $\tau_2/ns$ | $\tau_2 / \%$ | $\chi^2$ |
|------------------------------|---------------------|--------------|-------------|---------------|-------------|---------------|----------|
| <b>Pc-BP-Pc</b> (88 $\mu$ M) | 653                 | 0.1          | 14.9        | 0.83          | 0.8         | 0.17          | 1.1      |
|                              |                     | 20           | 14.9        | 0.83          | 0.8         | 0.17          | 1.2      |
|                              |                     | 40           | 15.0        | 0.81          | 0.8         | 0.19          | 1.2      |
|                              |                     | 60           | 15.2        | 0.80          | 0.7         | 0.20          | 1.2      |
|                              |                     | 80           | 15.3        | 0.78          | 0.7         | 0.22          | 1.1      |
|                              |                     | 100          | 15.5        | 0.78          | 0.8         | 0.22          | 1.1      |
|                              |                     | 120          | 15.6        | 0.78          | 0.8         | 0.22          | 1.2      |
|                              |                     | 140          | 15.8        | 0.77          | 0.7         | 0.23          | 1.1      |
|                              |                     | 160          | 15.9        | 0.79          | 0.8         | 0.21          | 1.2      |
|                              |                     | 180          | 16.0        | 0.79          | 0.8         | 0.21          | 1.2      |
| <b>Pc-ref</b> (111 $\mu$ M)  | 642                 | 0.1          | 15.2        | 1.00          |             |               | 1.3      |
|                              |                     | 20           | 15.0        | 1.00          |             |               | 1.0      |
|                              |                     | 40           | 15.0        | 1.00          |             |               | 1.2      |
|                              |                     | 60           | 15.0        | 1.00          |             |               | 1.1      |
|                              |                     | 80           | 15.1        | 1.00          |             |               | 1.1      |
|                              |                     | 100          | 15.2        | 1.00          |             |               | 1.3      |
|                              |                     | 120          | 15.4        | 1.00          |             |               | 1.1      |
|                              |                     | 140          | 15.5        | 1.00          |             |               | 1.2      |
|                              |                     | 160          | 15.6        | 1.00          |             |               | 1.2      |
|                              |                     | 180          | 15.7        | 1.00          |             |               | 1.0      |

<sup>a</sup>Fluorescence lifetime ( $\tau$ ) and population (%) of each component, determined by the hydrostatic pressure single photon counting method in degassed solution at room temperature;  $\lambda_{ex} = 405$  nm. <sup>b</sup>Monitoring wavelength.



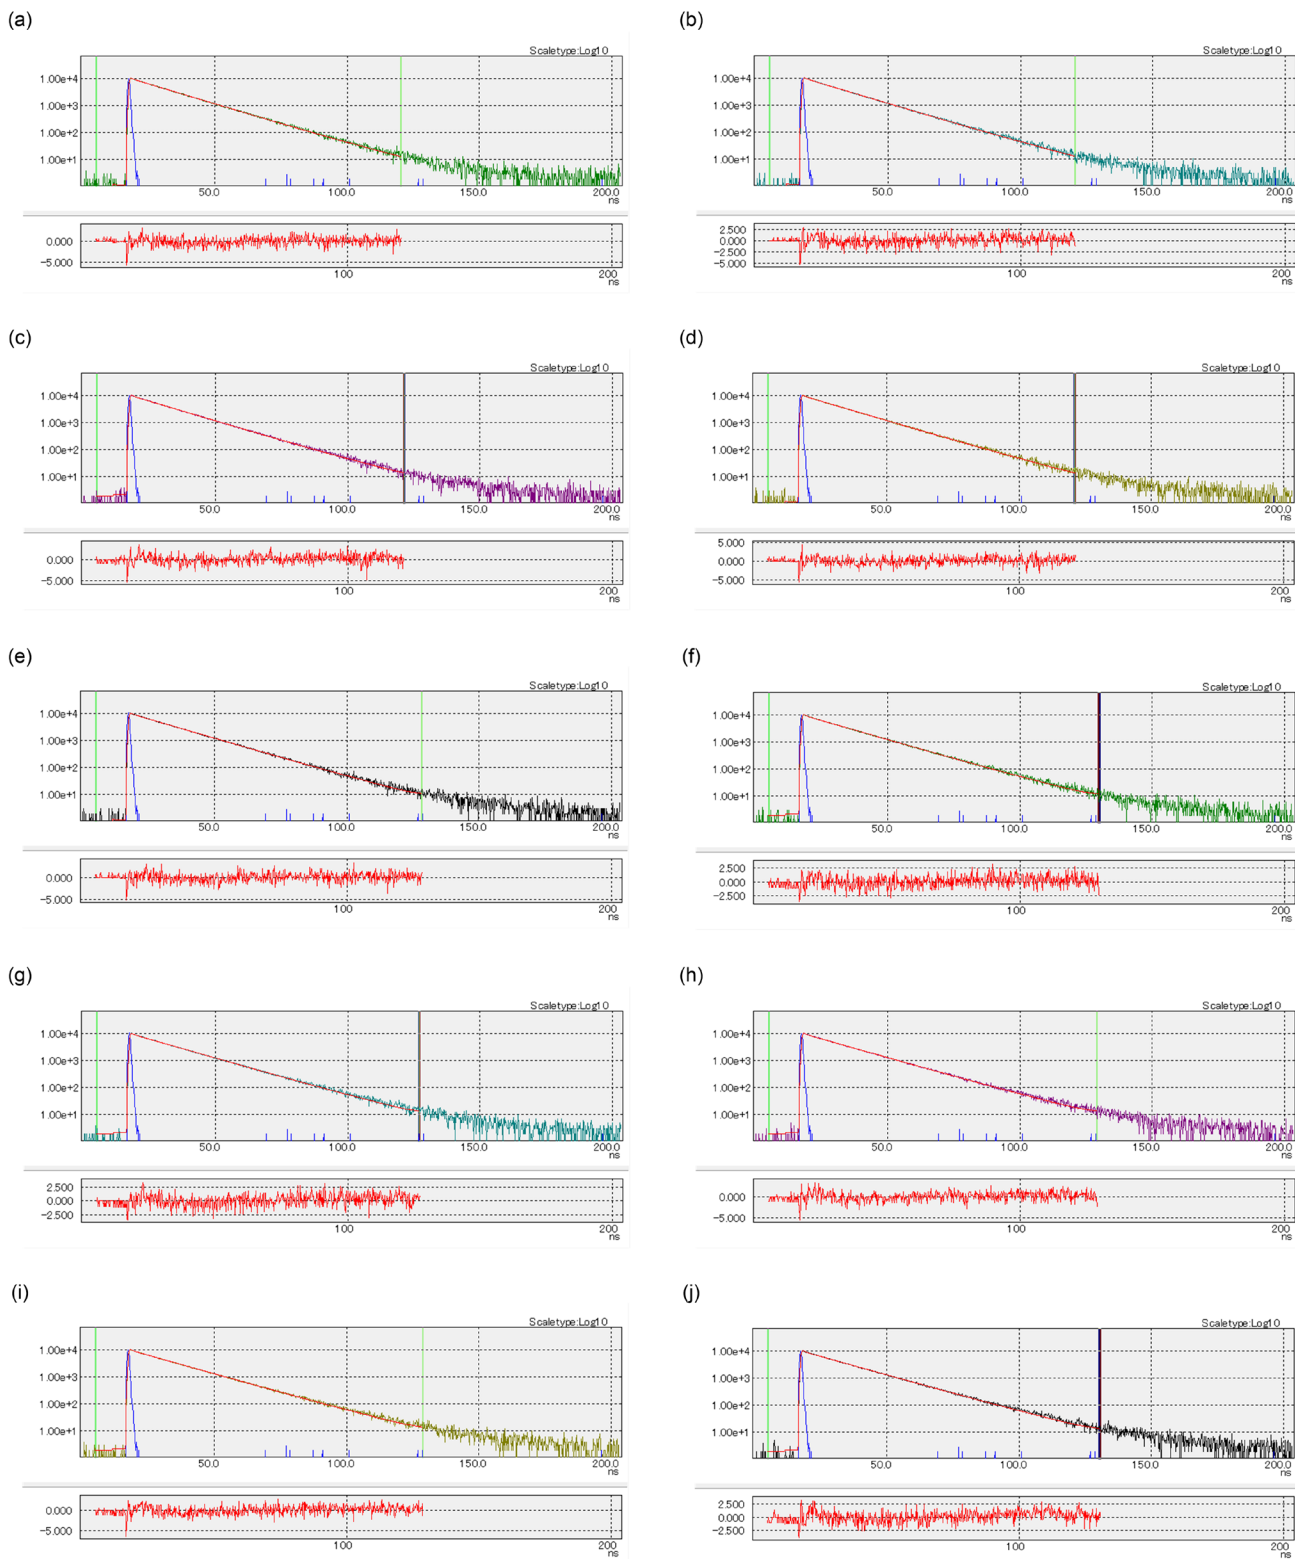

**Figure S13.** Time-correlated fluorescence decays of **Pc-BP-Pc** (88  $\mu\text{M}$ ) monitored at 653 nm at (a) 0.1, (b) 20, (c) 40, (d) 60, (e) 80, (f) 100, (g) 120, (h) 140, (i) 160, and (j) 180 MPa in MCH at room temperature, measured in a high-pressure cell, where the colored, red, and blue lines represent the fluorescence decay, fitting result, and the instrument response function, respectively.

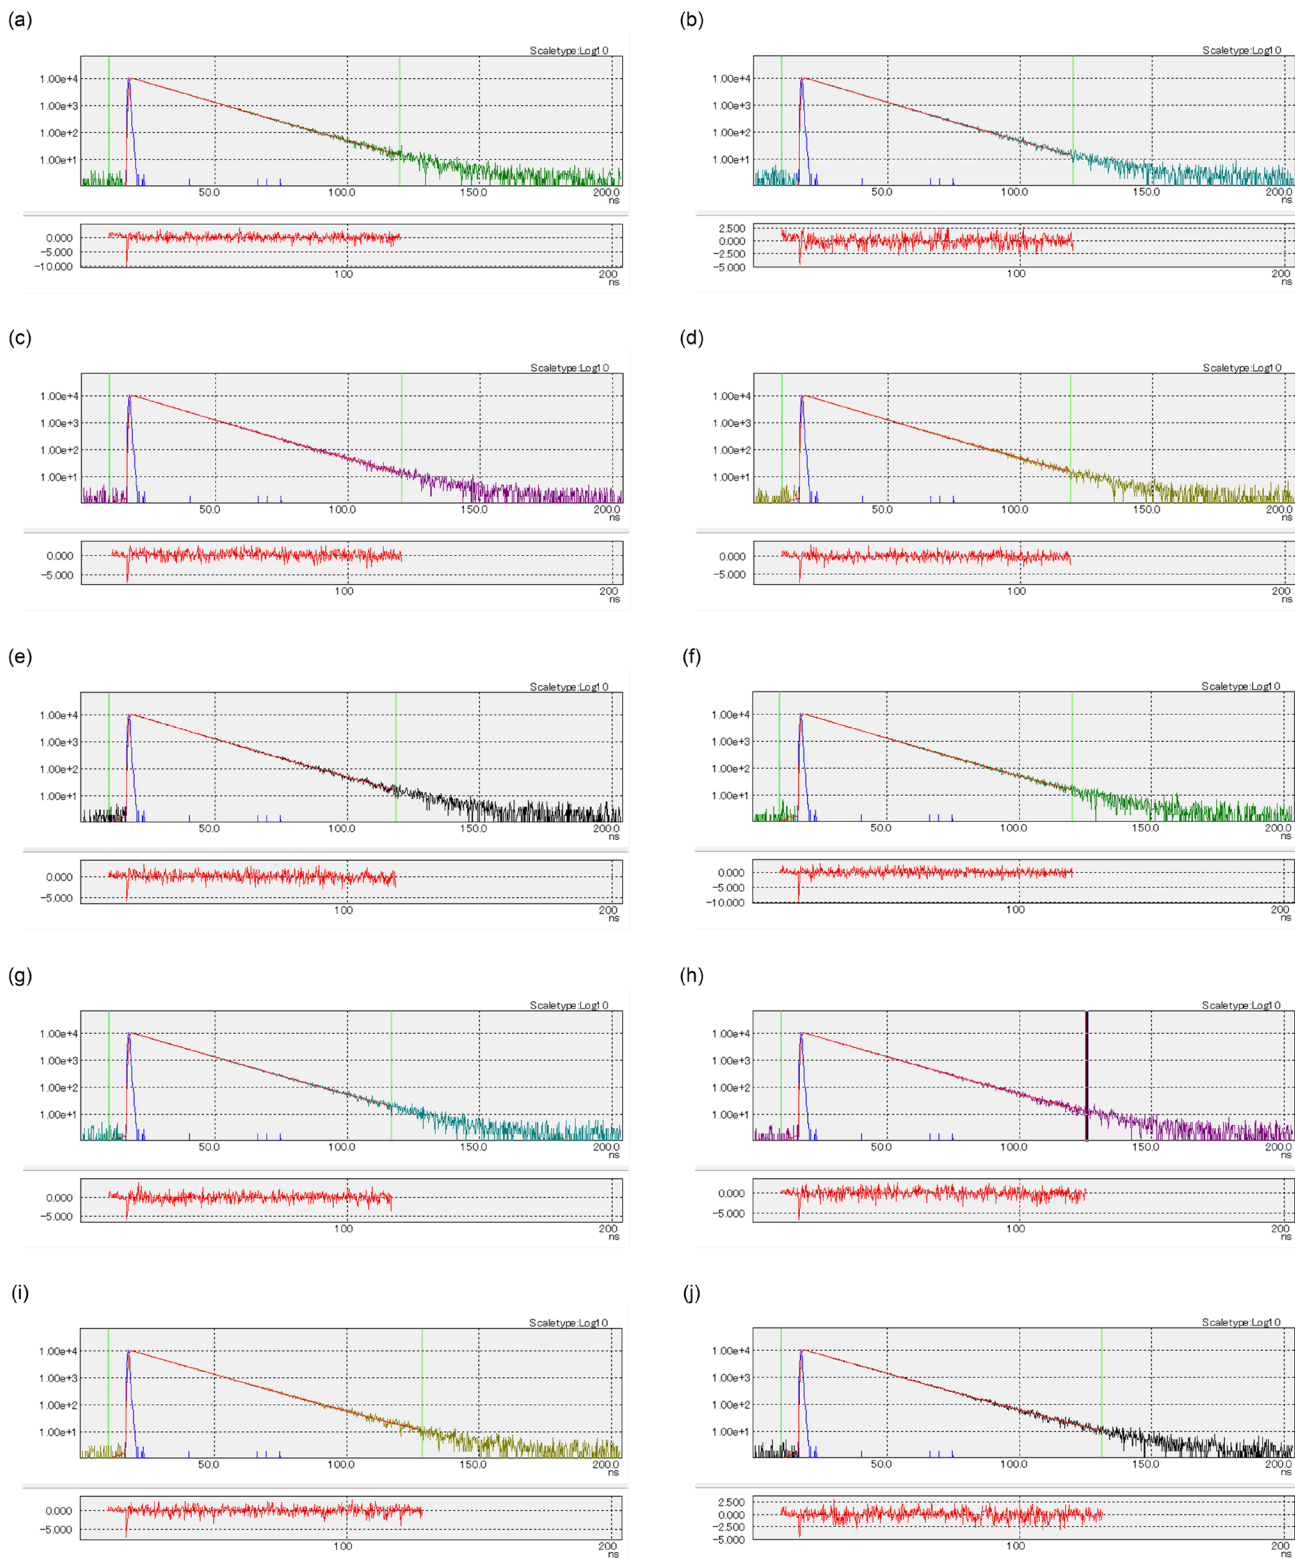

**Figure S14.** Time-correlated fluorescence decays of **Pc-ref** (111  $\mu\text{M}$ ) monitored at 642 nm at (a) 0.1, (b) 20, (c) 40, (d) 60, (e) 80, (f) 100, (g) 120, (h) 140, (i) 160, and (j) 180 MPa in MCH at room temperature, measured in a high-pressure cell, where the colored, red, and blue lines represent the fluorescence decay, fitting result, and the instrument response function, respectively.

**Table S4. Fluorescence Lifetimes of Pc-BP-Pc and Pc-ref in THF under Hydrostatic Pressure<sup>a</sup>**

| Sample                              | $\lambda_{\text{em}}^b/\text{nm}$ | Pressure/MPa | $\tau_1/\text{ns}$ | $\tau_1/\%$ | $\tau_2/\text{ns}$ | $\tau_2/\%$ | $\chi^2$ |
|-------------------------------------|-----------------------------------|--------------|--------------------|-------------|--------------------|-------------|----------|
| <b>Pc-BP-Pc</b> (77 $\mu\text{M}$ ) | 655                               | 40           | 12.3               | 0.71        | 0.8                | 0.29        | 1.2      |
|                                     |                                   | 60           | 12.1               | 0.70        | 0.7                | 0.30        | 1.2      |
|                                     |                                   | 80           | 12.0               | 0.69        | 0.7                | 0.31        | 1.3      |
|                                     |                                   | 100          | 12.0               | 0.67        | 0.6                | 0.33        | 1.3      |
|                                     |                                   | 120          | 11.9               | 0.66        | 0.6                | 0.34        | 1.1      |
|                                     |                                   | 140          | 11.9               | 0.65        | 0.7                | 0.35        | 1.2      |
|                                     |                                   | 160          | 11.7               | 0.65        | 0.6                | 0.35        | 1.3      |
|                                     |                                   | 180          | 11.9               | 0.65        | 0.7                | 0.35        | 1.3      |
| <b>Pc-ref</b> (95 $\mu\text{M}$ )   | 645                               | 40           | 12.3               | 1.00        |                    |             | 1.2      |
|                                     |                                   | 60           | 12.2               | 1.00        |                    |             | 1.1      |
|                                     |                                   | 80           | 12.2               | 1.00        |                    |             | 1.1      |
|                                     |                                   | 100          | 12.1               | 1.00        |                    |             | 1.2      |
|                                     |                                   | 120          | 12.1               | 1.00        |                    |             | 1.3      |
|                                     |                                   | 140          | 12.0               | 1.00        |                    |             | 1.1      |
|                                     |                                   | 160          | 12.0               | 1.00        |                    |             | 1.1      |
|                                     |                                   | 180          | 11.9               | 1.00        |                    |             | 1.2      |

<sup>a</sup>Fluorescence lifetime ( $\tau$ ) and population (%) of each component, determined by the hydrostatic pressure single photon counting method in degassed solution at room temperature;  $\lambda_{\text{ex}} = 405 \text{ nm}$ . <sup>b</sup>Monitoring wavelength.

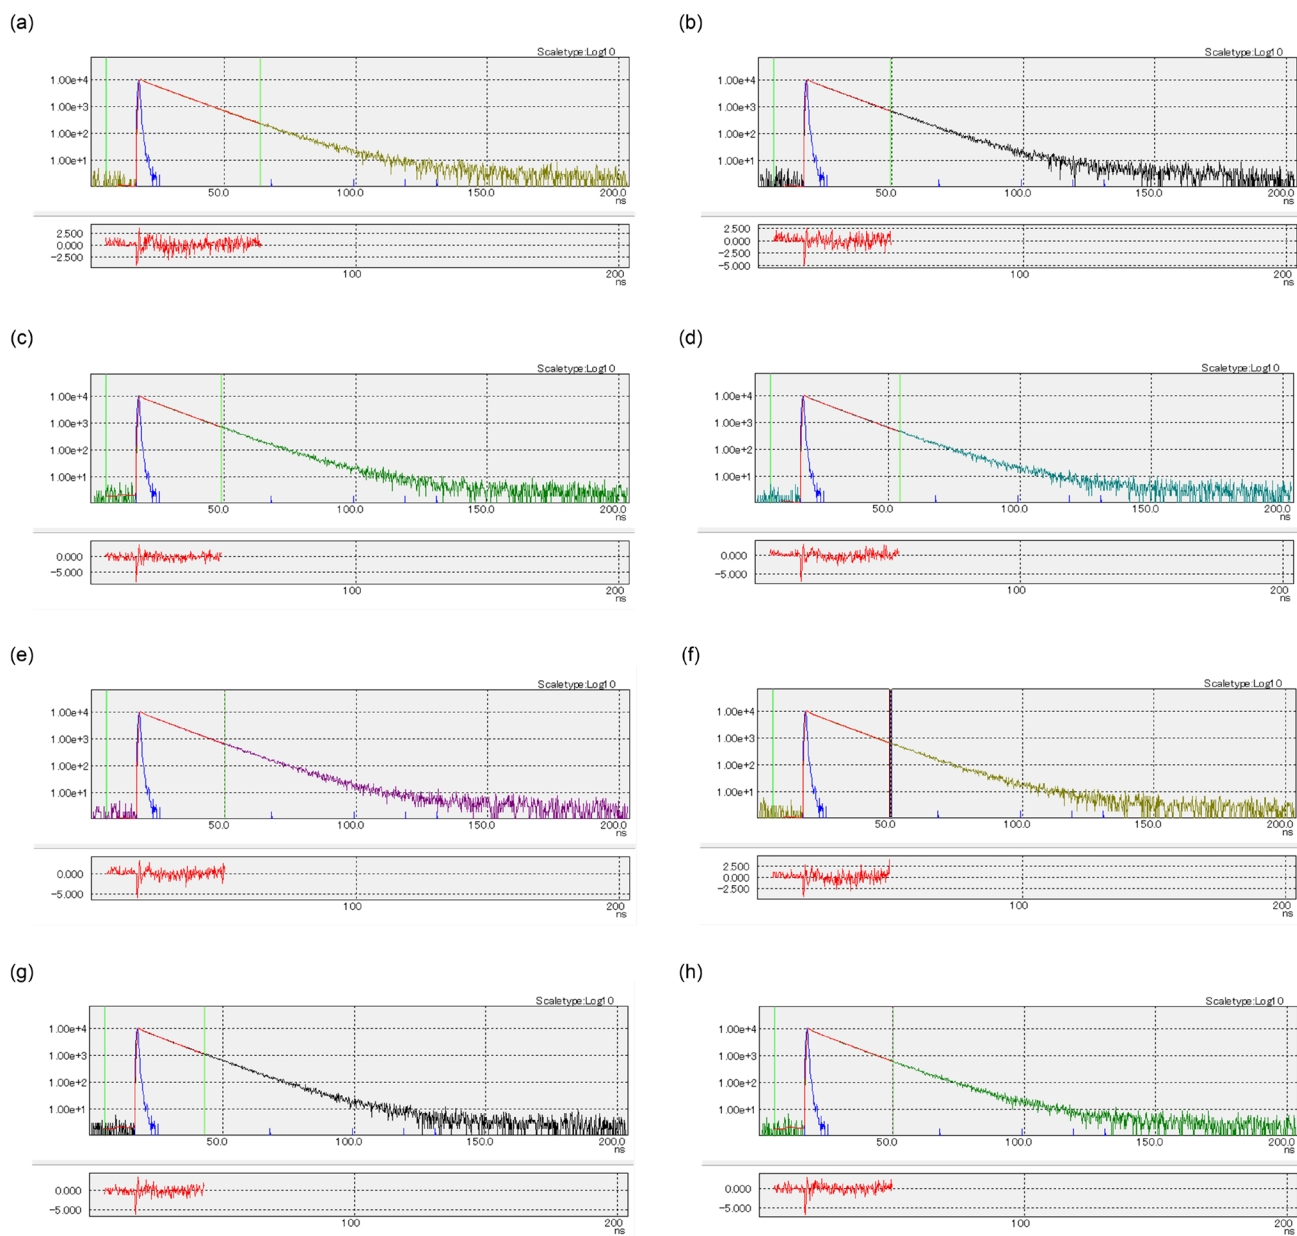

**Figure S15.** Time-correlated fluorescence decays of **Pc-BP-Pc** (77  $\mu\text{M}$ ) monitored at 655 nm at (a) 40, (b) 60, (c) 80, (d) 100, (e) 120, (f) 140, (g) 160, and (h) 180 MPa in THF at room temperature, measured in a high-pressure cell, where the colored, red, and blue lines represent the fluorescence decay, fitting result, and the instrument response function, respectively.

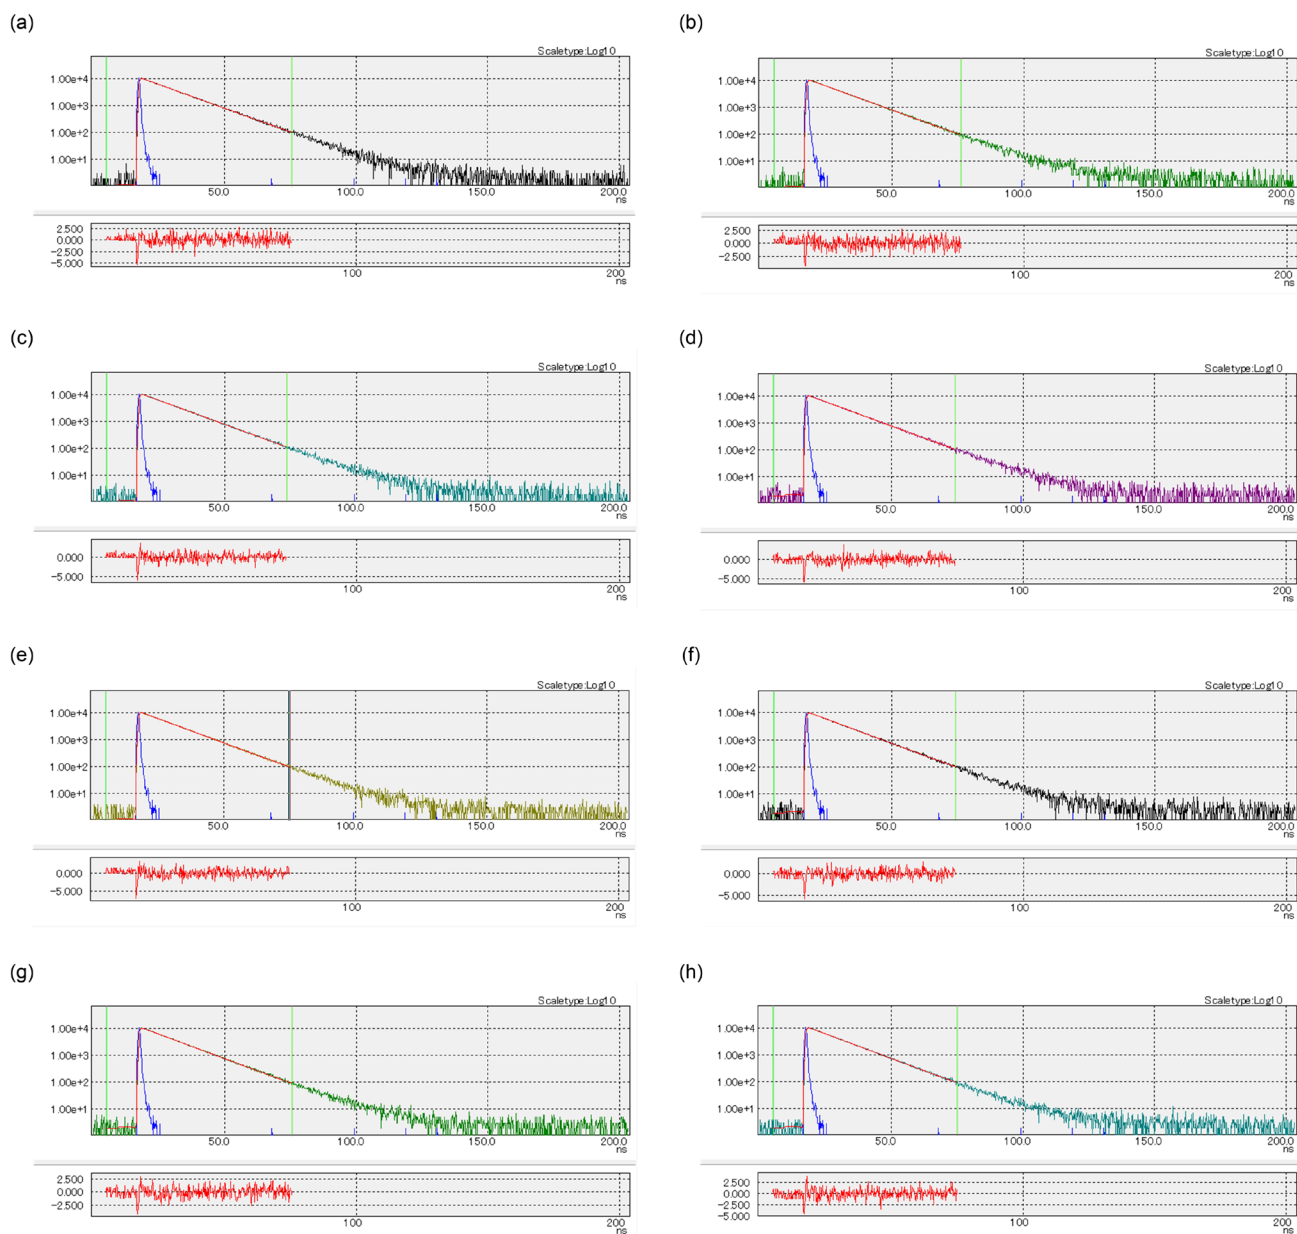

**Figure S16.** Time-correlated fluorescence decays of **Pc-ref** (95  $\mu\text{M}$ ) monitored at 645 nm at (a) 40, (b) 60, (c) 80, (d) 100, (e) 120, (f) 140, (g) 160, and (h) 180 MPa in THF at room temperature, measured in a high-pressure cell, where the colored, red, and blue lines represent the fluorescence decay, fitting result, and the instrument response function, respectively.

**Table S5. Pressure Dependence of  $k_{SF,app}$  of Pc-BP-Pc<sup>a</sup>**

| Pressure/MPa | $k_{SF,app}/10^9 \text{ s}^{-1}$ in toluene | $k_{SF,app}/10^9 \text{ s}^{-1}$ in MCH | $k_{SF,app}/10^9 \text{ s}^{-1}$ in THF |
|--------------|---------------------------------------------|-----------------------------------------|-----------------------------------------|
| 0.1          | 1.65                                        | 1.25                                    | <i>b</i>                                |
| 20           | 1.41                                        | 1.11                                    | <i>b</i>                                |
| 40           | 1.68                                        | 1.17                                    | 1.23                                    |
| 60           | 1.77                                        | 1.30                                    | 1.33                                    |
| 80           | 1.77                                        | 1.38                                    | 1.41                                    |
| 100          | 1.65                                        | 1.18                                    | 1.58                                    |
| 120          | 1.92                                        | 1.25                                    | 1.56                                    |
| 140          | 1.81                                        | 1.36                                    | 1.45                                    |
| 160          | 1.68                                        | 1.20                                    | 1.67                                    |
| 180          | 1.96                                        | 1.14                                    | 1.45                                    |

<sup>a</sup>Measured at 298 K. <sup>b</sup>Not determined.

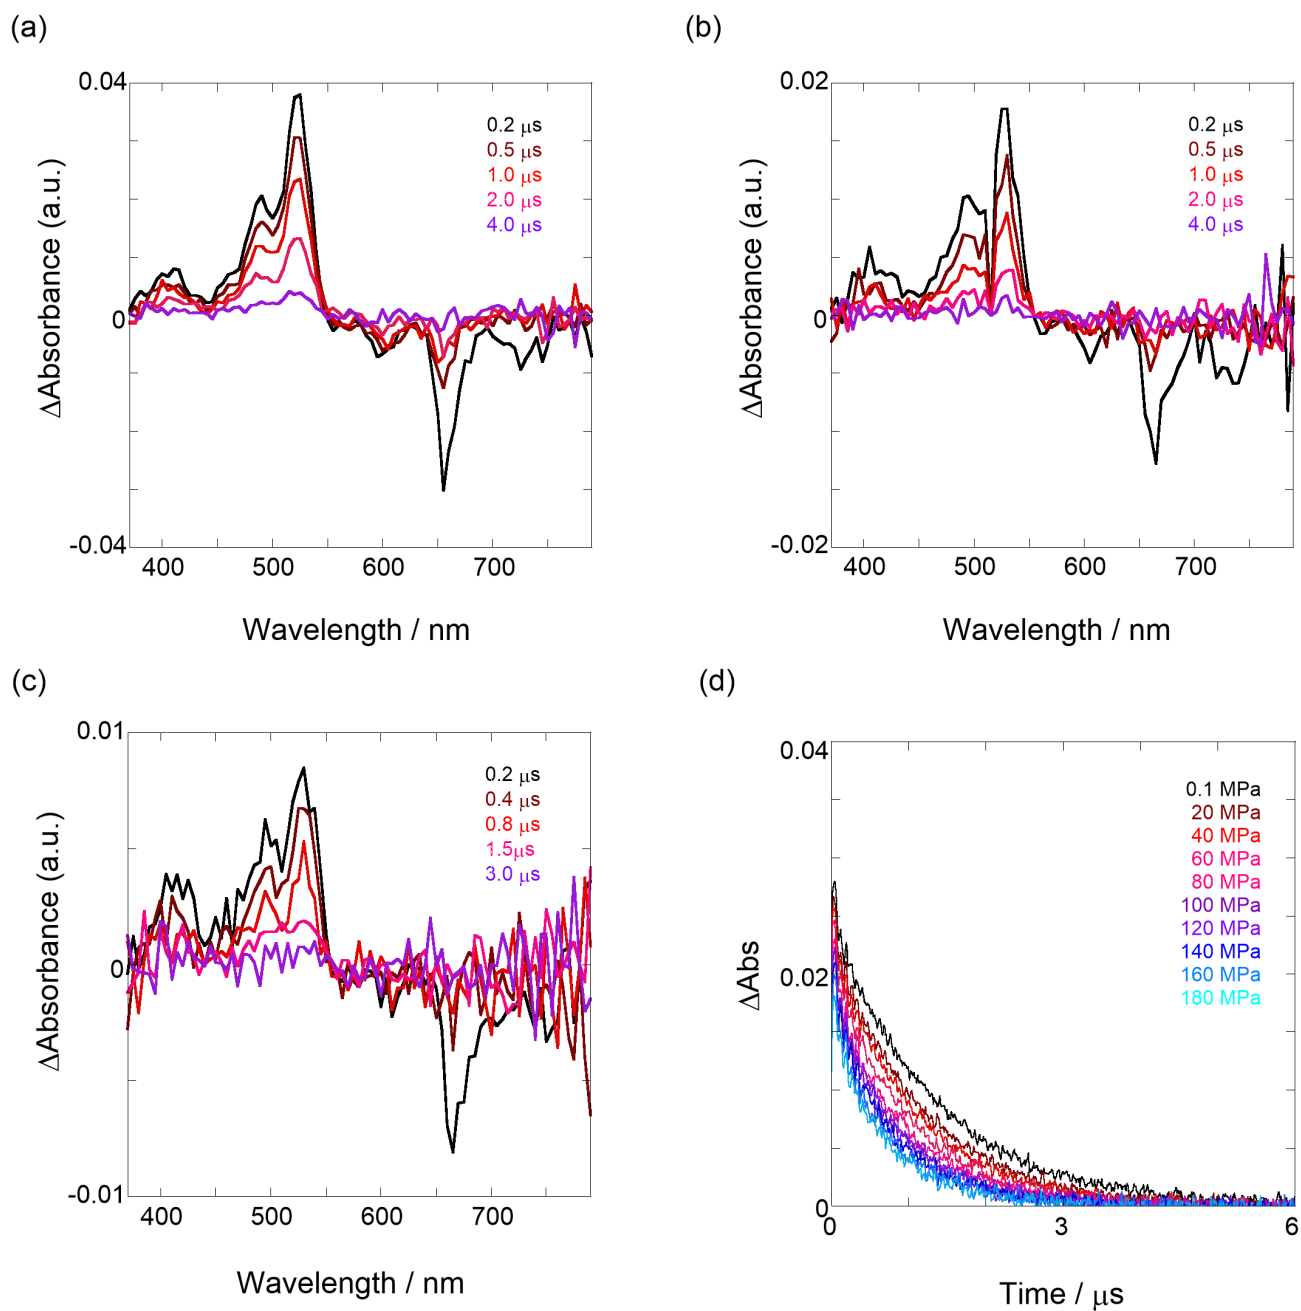

**Figure S17.** nsTA spectra ( $\lambda_{\text{ex}} = 532$  nm) of **Pc-BP-Pc** (81  $\mu$ M) in toluene at (a) 0.1, (b) 160, and (c) 320 MPa and (d) nsTA decay profiles ( $\lambda_{\text{ex}} = 532$  nm) of **Pc-BP-Pc** in MCH (84  $\mu$ M,  $\lambda_{\text{obs}} = 516$  nm) at 0.1, 20, 40, 60, 80, 100, 120, 140, 160, and 180 MPa (from black to sky blue) at room temperature, measured in a high-pressure cell.

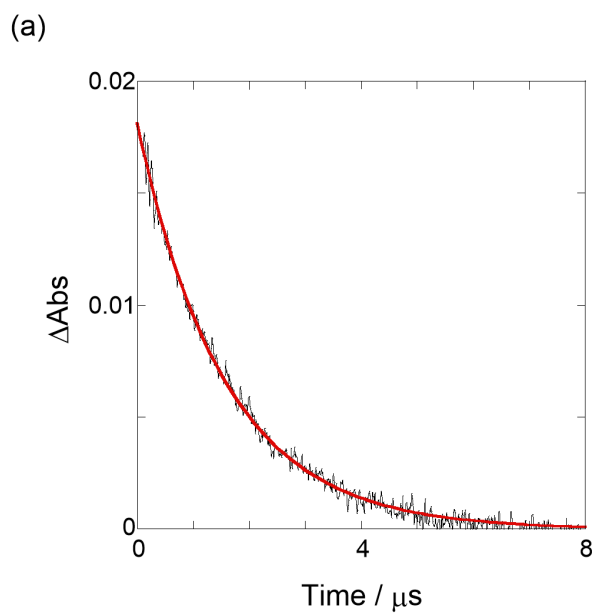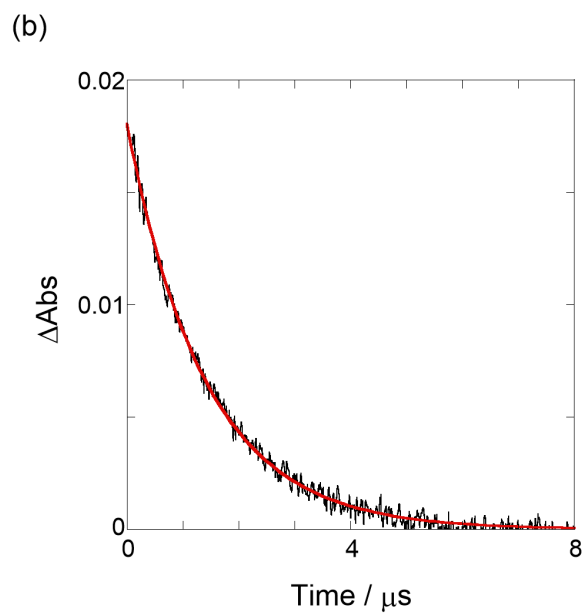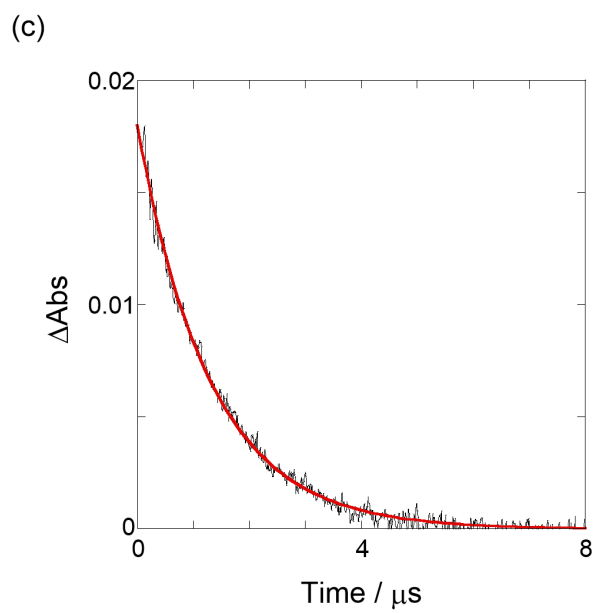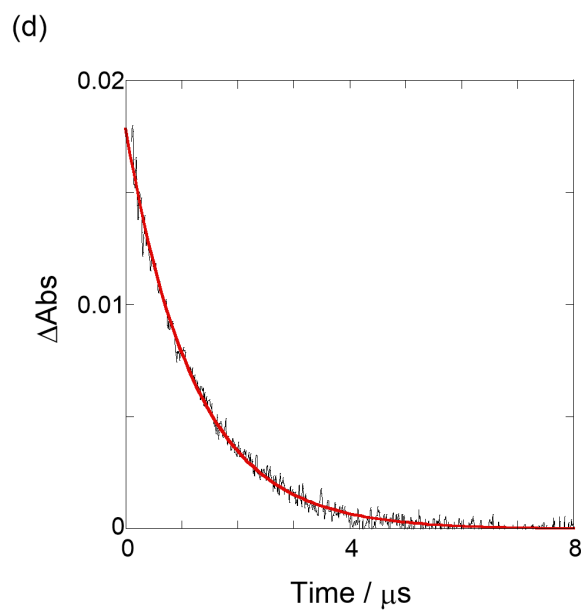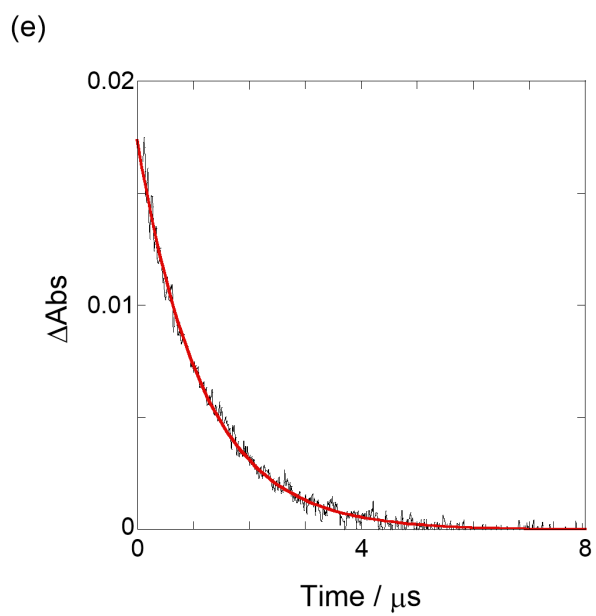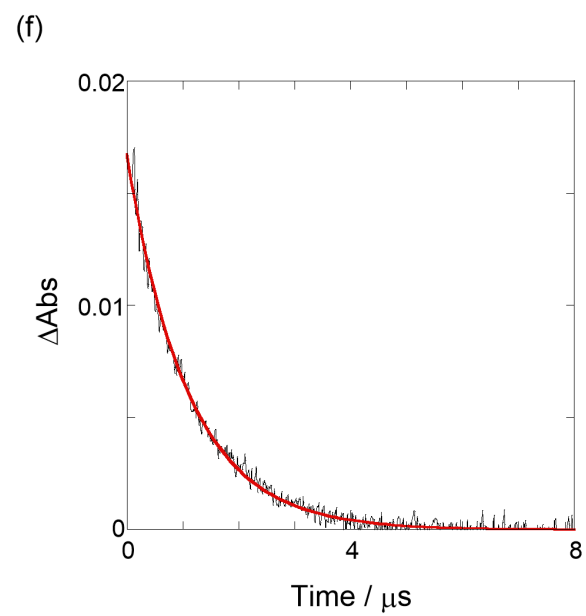



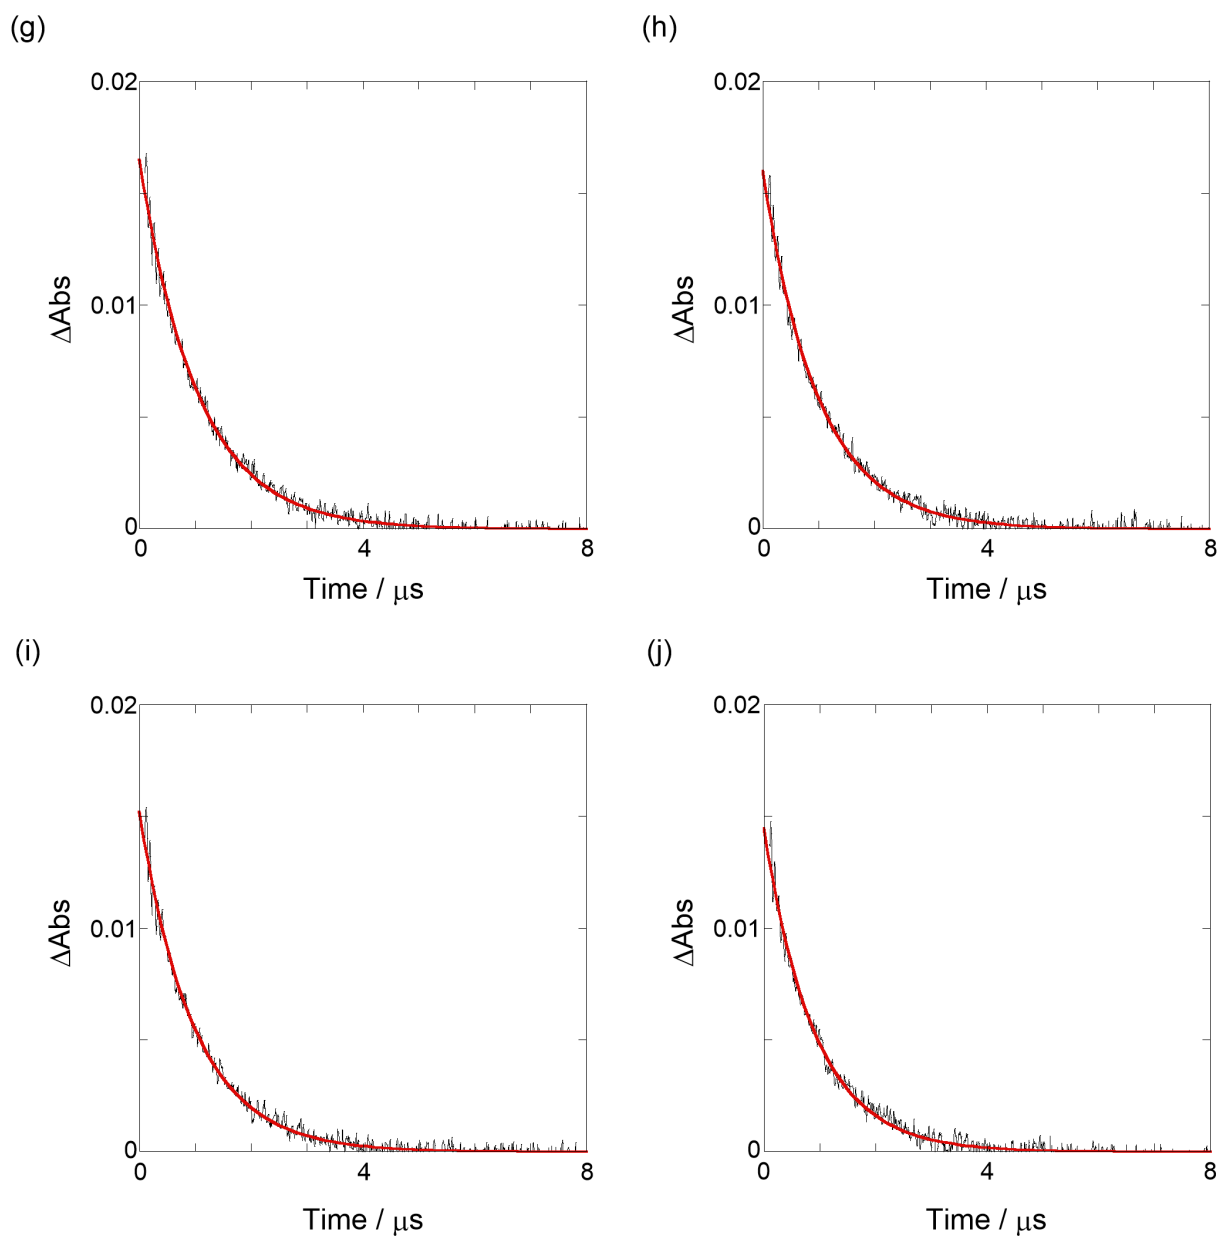

**Figure S18.** nsTA decay profiles ( $\lambda_{\text{ex}} = 532 \text{ nm}$ ,  $\lambda_{\text{obs}} = 525 \text{ nm}$ ) of **Pc-BP-Pc** (81  $\mu\text{M}$ ) in toluene at room temperature at (a) 0.1, (b) 20, (c) 40, (d) 60, (e) 80, (f) 100, (g) 120, (h) 140, (i) 160, and (j) 180 MPa, measured in a high-pressure cell, where the black and red lines represent the decay and fitting result, respectively.

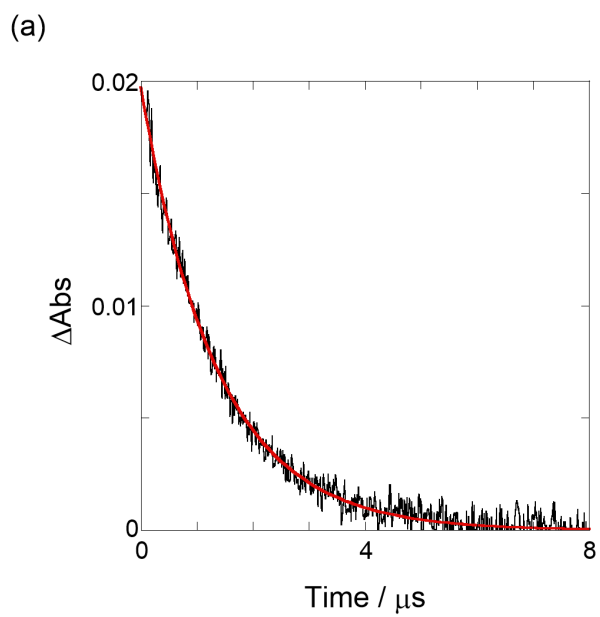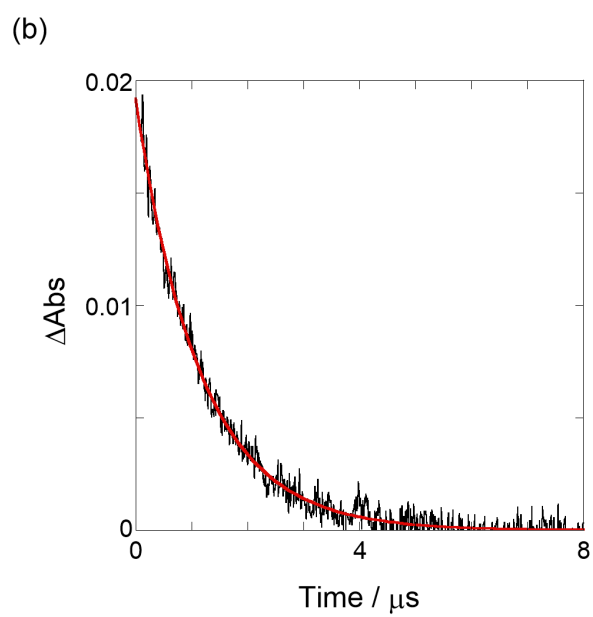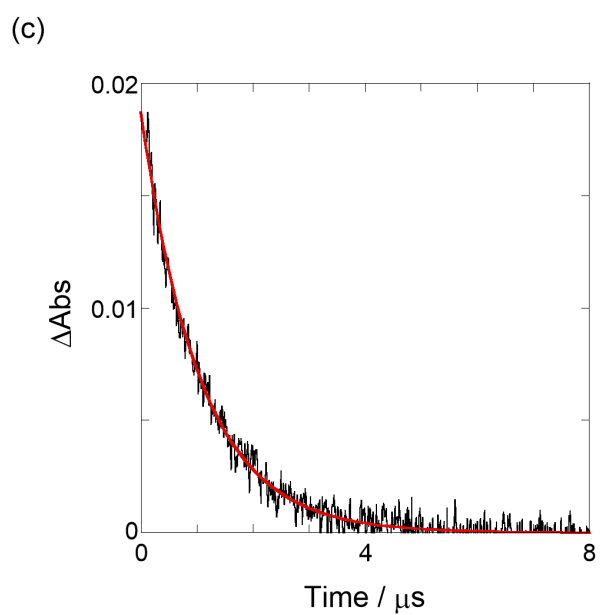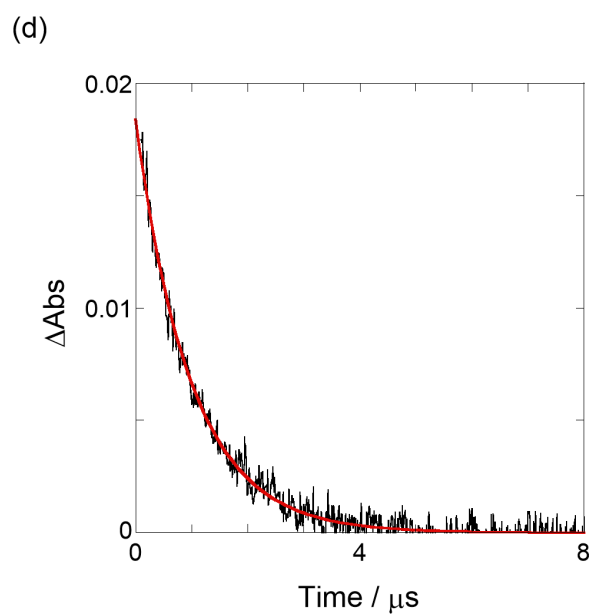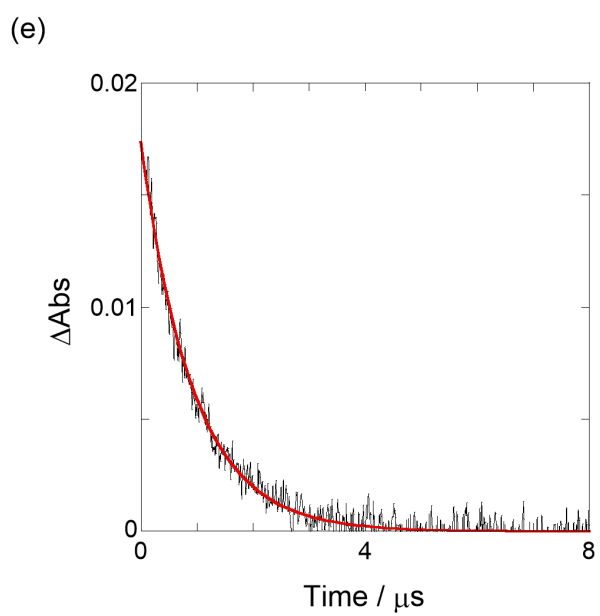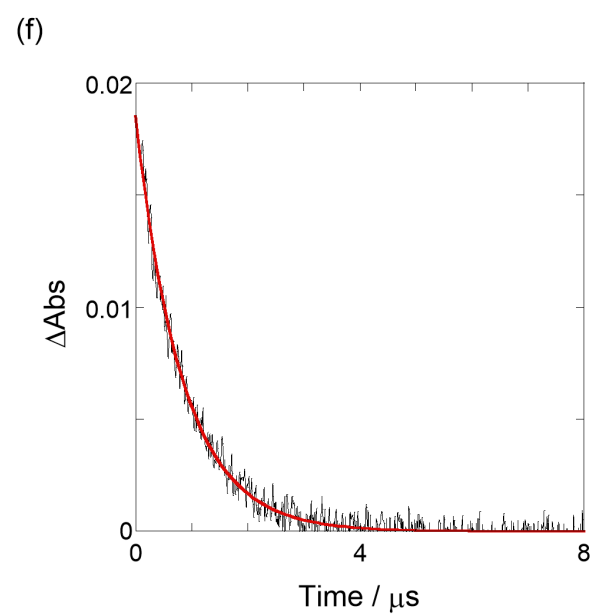

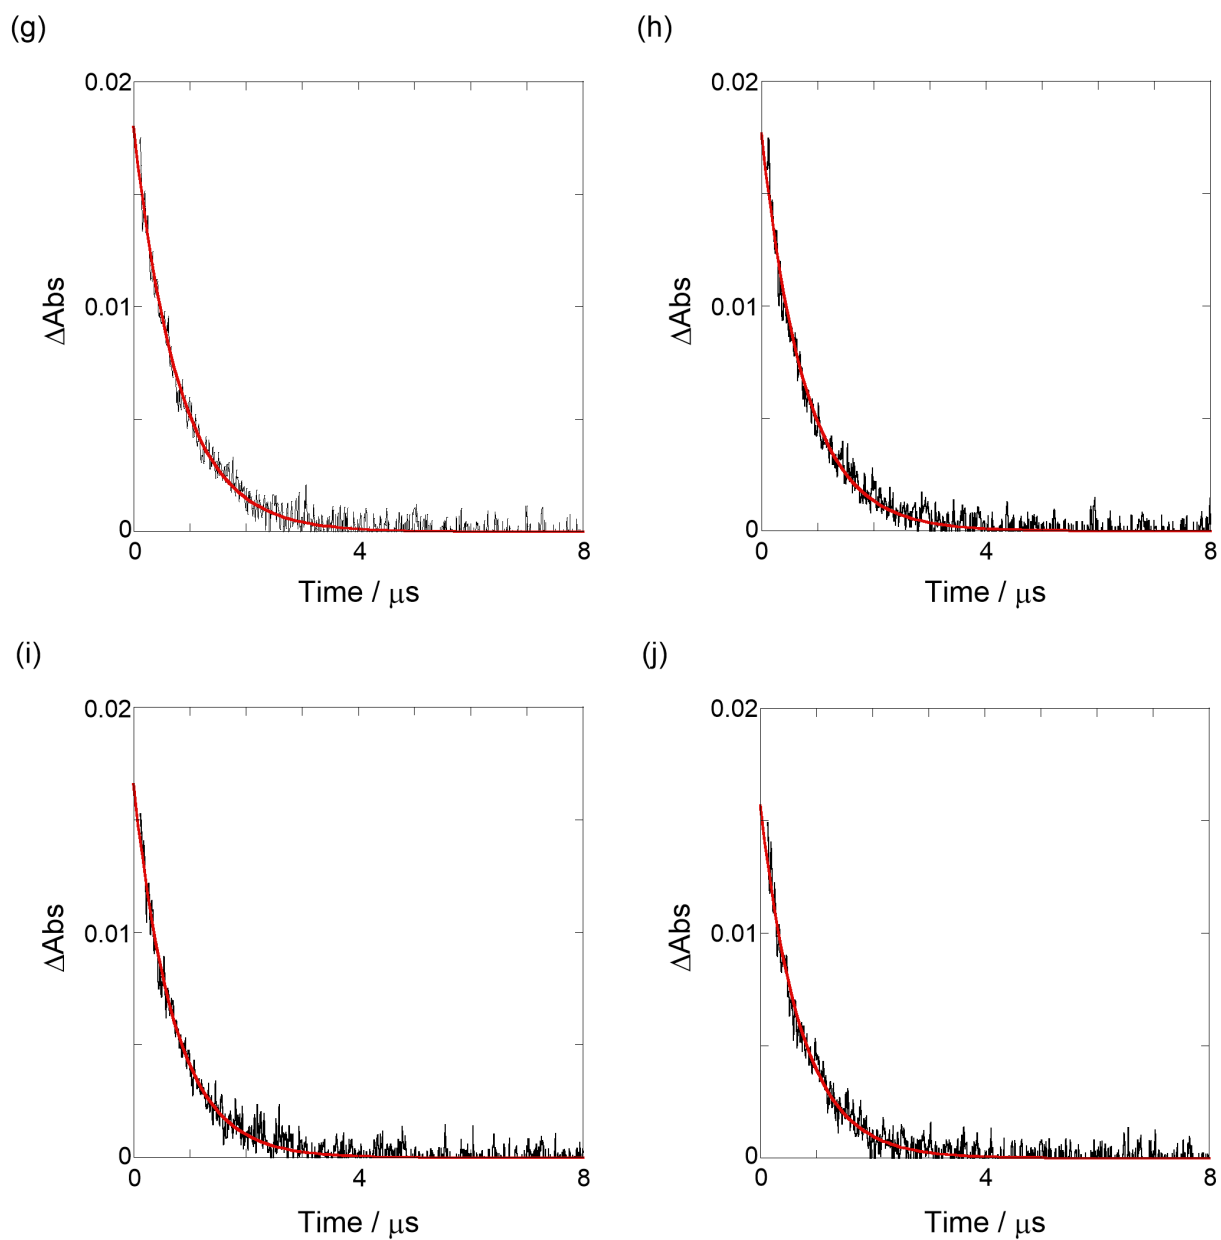

**Figure S19.** nsTA decay profiles ( $\lambda_{\text{ex}} = 532 \text{ nm}$ ,  $\lambda_{\text{obs}} = 520 \text{ nm}$ ) of **Pc-BP-Pc** ( $74 \mu\text{M}$ ) in MCH at room temperature at (a) 0.1, (b) 20, (c) 40, (d) 60, (e) 80, (f) 100, (g) 120, (h) 140, (i) 160, and (j) 180 MPa, measured in a high-pressure cell, where the black and red lines represent the decay and fitting result, respectively.

**Table S6. Triplet Lifetimes ( $\tau_T$ ) of Pc-BP-Pc in Toluene and MCH under Hydrostatic Pressure<sup>a</sup>**

| Pressure/MPa | $\tau_T/\mu\text{s}$ in toluene | $\tau_T/\mu\text{s}$ in MCH |
|--------------|---------------------------------|-----------------------------|
| 0.1          | 1.56                            | 1.35                        |
| 20           | 1.40                            | 1.15                        |
| 40           | 1.30                            | 1.05                        |
| 60           | 1.22                            | 0.98                        |
| 80           | 1.16                            | 0.92                        |
| 100          | 1.09                            | 0.83                        |
| 120          | 1.04                            | 0.80                        |
| 140          | 0.99                            | 0.78                        |
| 160          | 0.98                            | 0.72                        |
| 180          | 0.91                            | 0.72                        |

<sup>a</sup>Measured at 298 K.

**Table S7. Relative S<sub>1</sub> Quantum Yields ( $\Phi_S$ ) of Pc-BP-Pc (67  $\mu$ M) in Toluene under Hydrostatic Pressure<sup>a</sup>**

| Pressure/MPa | $d/g\text{ cm}^{-3}$ | $n_P$ | $A_P^d$ | $D_P$  | $\Phi_S$ |
|--------------|----------------------|-------|---------|--------|----------|
| 0.1          | 0.862 <sup>b</sup>   | 1.494 | 0.102   | 7770.8 | 0.0140   |
| 20           | 0.877 <sup>c</sup>   | 1.503 | 0.103   | 7392.7 | 0.0134   |
| 40           | 0.890 <sup>c</sup>   | 1.511 | 0.102   | 7098.5 | 0.0131   |
| 60           | 0.901 <sup>c</sup>   | 1.518 | 0.102   | 6970.0 | 0.0130   |
| 80           | 0.911 <sup>c</sup>   | 1.524 | 0.102   | 6858.7 | 0.0129   |
| 100          | 0.921 <sup>c</sup>   | 1.530 | 0.102   | 6764.7 | 0.0128   |
| 120          | 0.930 <sup>c</sup>   | 1.536 | 0.103   | 6726.6 | 0.0128   |
| 140          | 0.938 <sup>c</sup>   | 1.540 | 0.102   | 6720.6 | 0.0129   |
| 160          | 0.945 <sup>c</sup>   | 1.545 | 0.103   | 6747.8 | 0.0130   |
| 180          | 0.952 <sup>c</sup>   | 1.549 | 0.103   | 6815.2 | 0.0131   |

<sup>a</sup>Measured at 298 K. <sup>b</sup>Ref. 47. <sup>c</sup>Ref. 48. <sup>d</sup>Extracted from Figure 2a.

**Table S8. Relative S<sub>1</sub> Quantum Yields ( $\Phi_S$ ) of Pc-BP-Pc (87  $\mu$ M) in MCH under Hydrostatic Pressure<sup>a</sup>**

| Pressure/MPa | $d/g\text{ cm}^{-3}$ | $n_P$ | $A_P^e$ | $D_P$  | $\Phi_S$ |
|--------------|----------------------|-------|---------|--------|----------|
| 0.1          | 0.765 <sup>b</sup>   | 1.421 | 0.058   | 9643.0 | 0.0514   |
| 20           | 0.781 <sup>c</sup>   | 1.430 | 0.057   | 9215.4 | 0.0503   |
| 40           | 0.794 <sup>c</sup>   | 1.438 | 0.057   | 9070.1 | 0.0501   |
| 60           | 0.805 <sup>c</sup>   | 1.444 | 0.057   | 8900.9 | 0.0496   |
| 80           | 0.816 <sup>c</sup>   | 1.450 | 0.058   | 8794.5 | 0.0492   |
| 100          | 0.825 <sup>c</sup>   | 1.456 | 0.058   | 8738.1 | 0.0488   |
| 120          | 0.834 <sup>c</sup>   | 1.461 | 0.058   | 8875.1 | 0.0501   |
| 140          | 0.841 <sup>c</sup>   | 1.466 | 0.058   | 8888.8 | 0.0499   |
| 160          | 0.846 <sup>d</sup>   | 1.468 | 0.058   | 8913.7 | 0.0505   |
| 180          | 0.850 <sup>d</sup>   | 1.471 | 0.058   | 8934.0 | 0.0507   |

<sup>a</sup>Measured at 298 K. <sup>b</sup>Ref. 47. <sup>c</sup>Ref. 49. <sup>d</sup>Extrapolated values. <sup>e</sup>Extracted from Figure S5a.

(a)

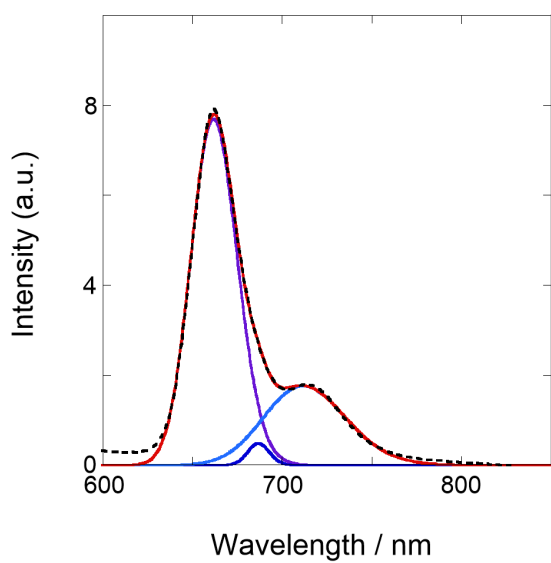

(b)

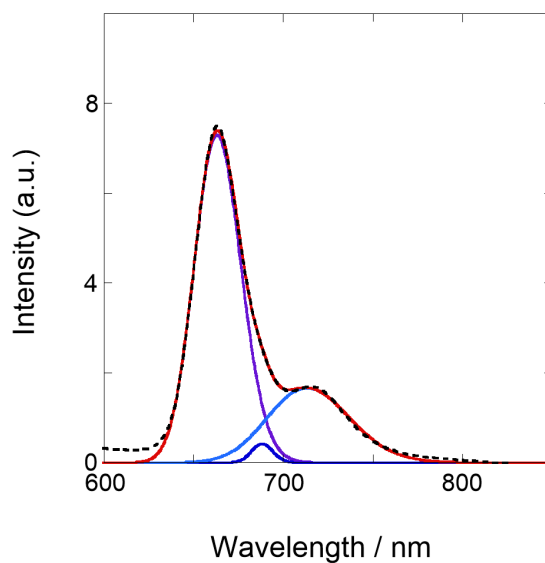

(c)

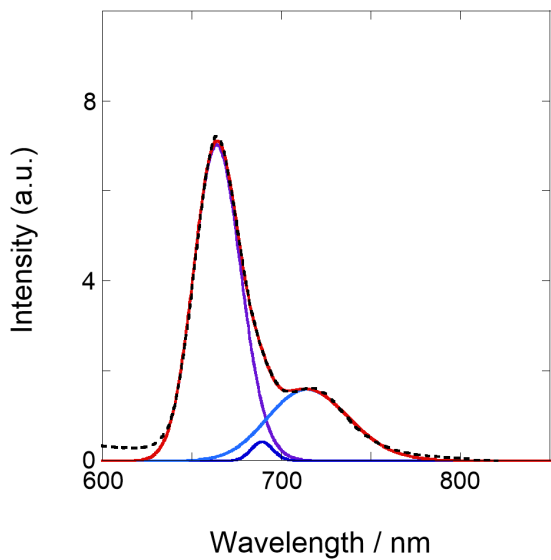

(d)

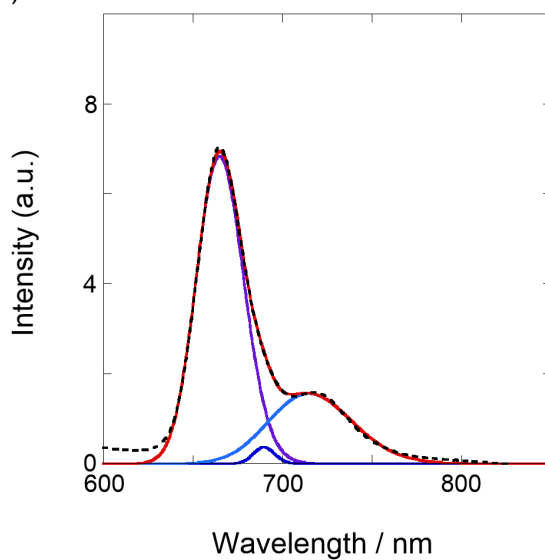

(e)

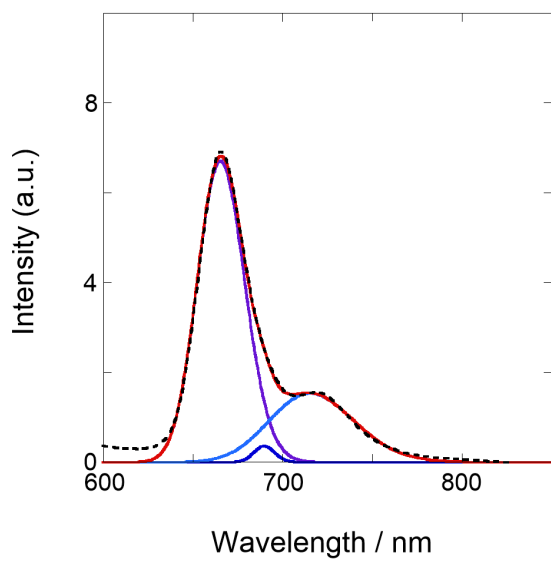

(f)

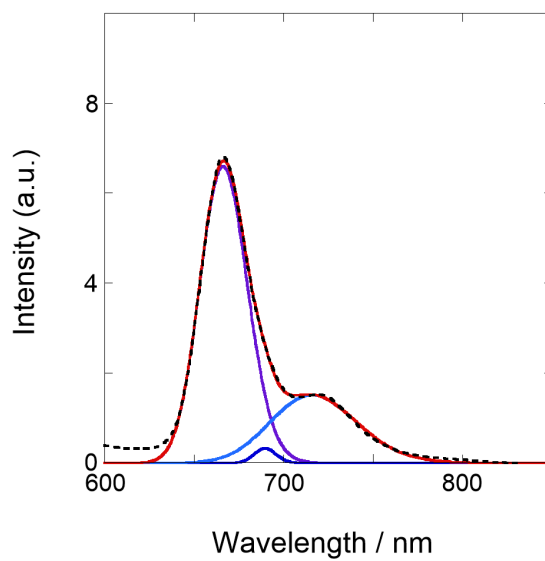

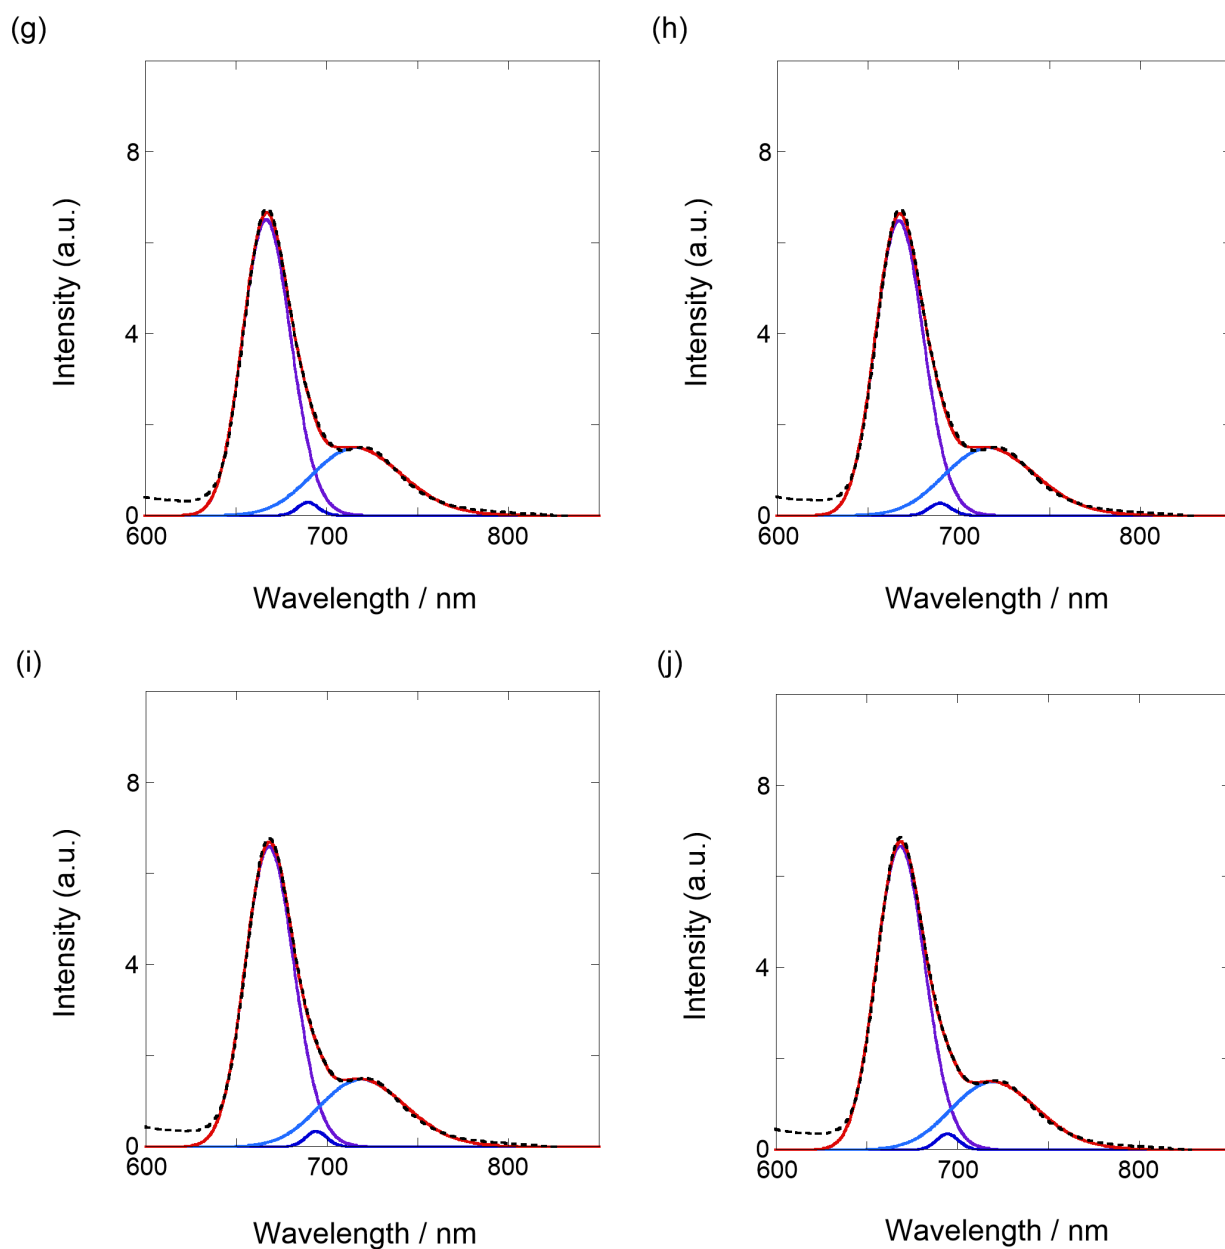

**Figure S20.** Fluorescence spectra ( $\lambda_{\text{ex}} = 580$  nm, dotted lines), results of waveform separation spectra (purple, blue, and sky blue lines) and integrated spectra (red lines) of **Pc-BP-Pc** (67  $\mu\text{M}$ ) in toluene at (a) 0.1, (b) 20, (c) 40, (d) 60, (e) 80, (f) 100, (g) 120, (h) 140, (i) 160, and (j) 180 MPa.

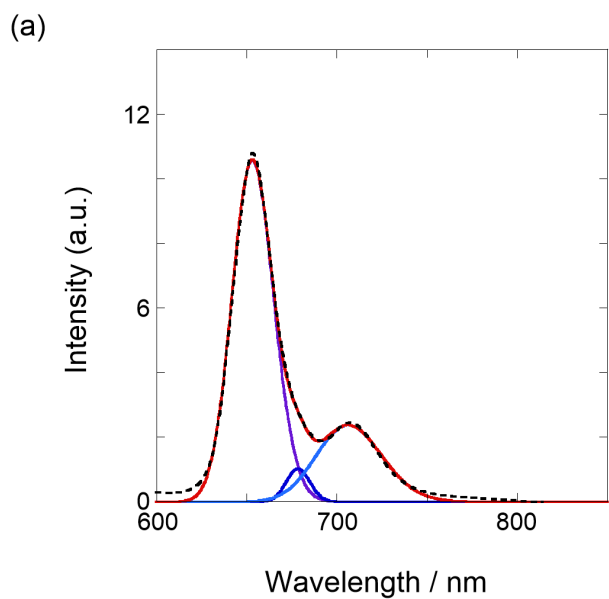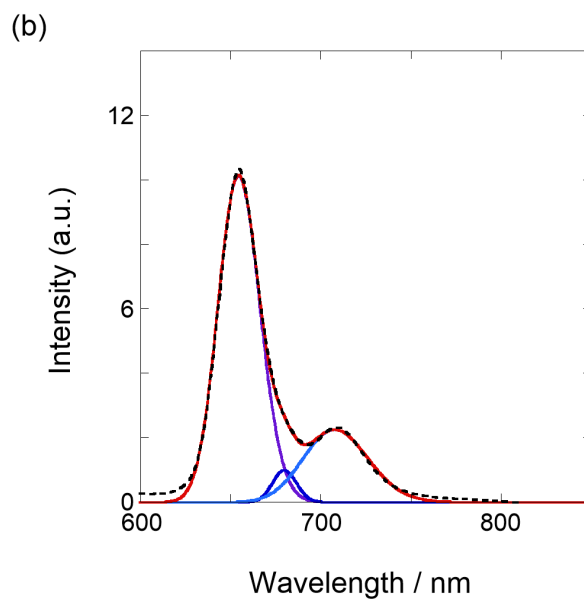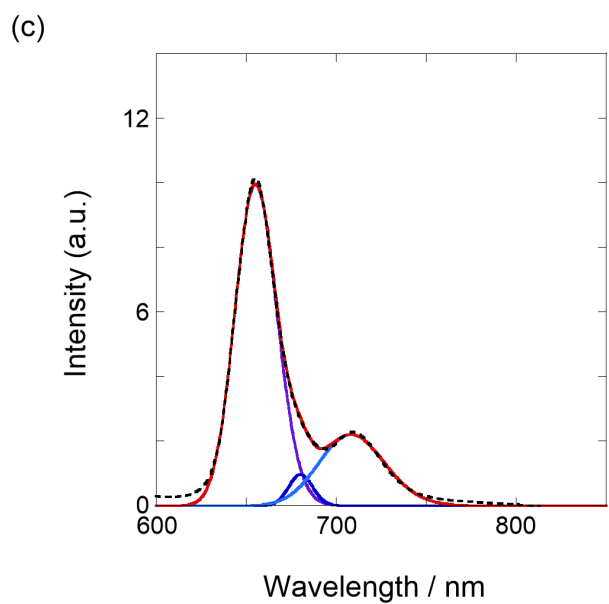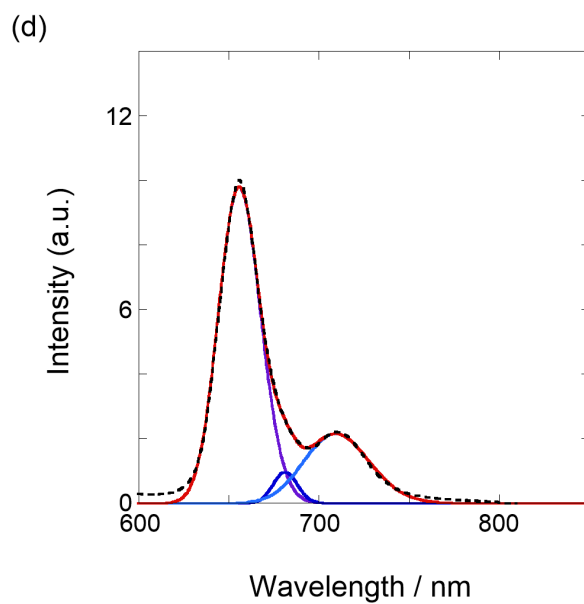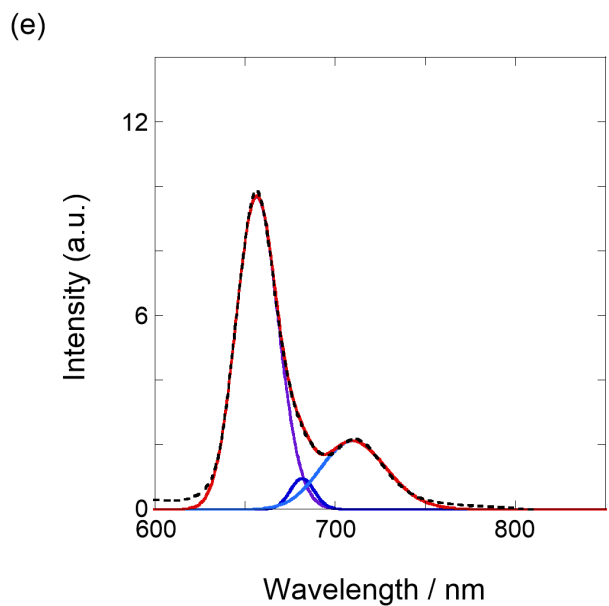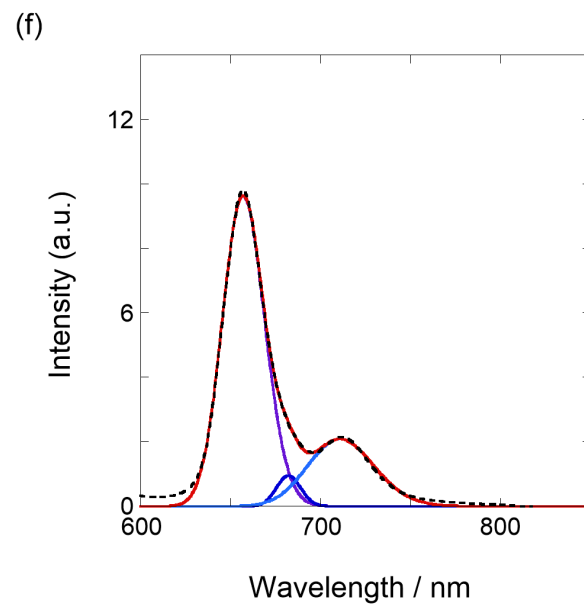



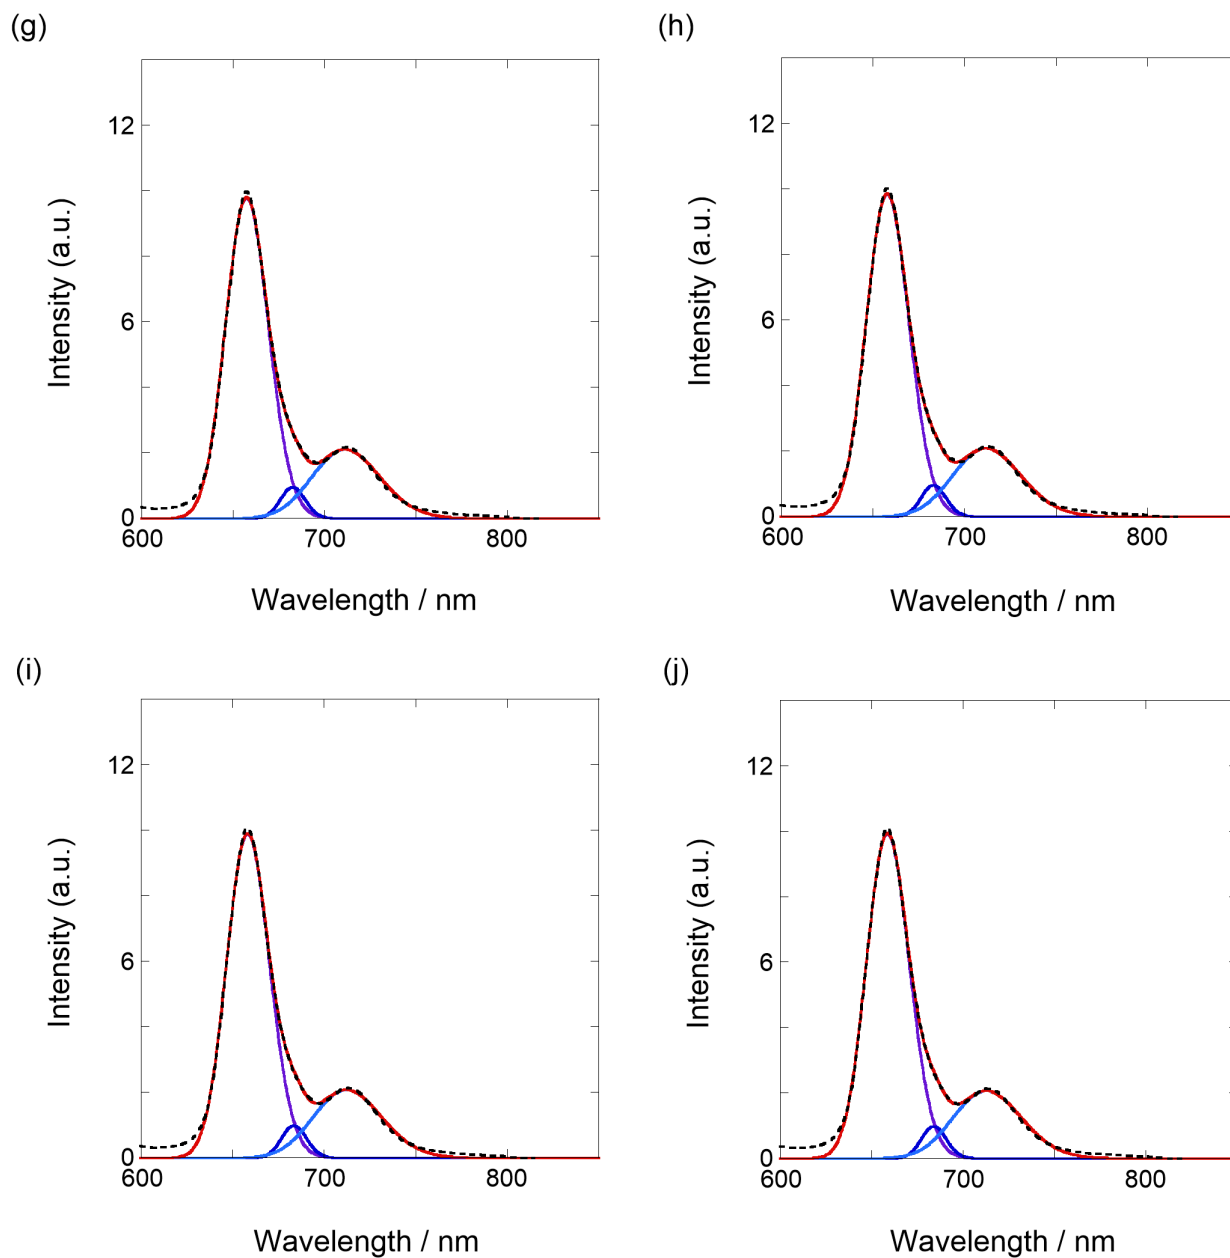

**Figure S21.** Fluorescence spectra ( $\lambda_{\text{ex}} = 576$  nm, dotted lines), results of waveform separation spectra (purple, blue, and sky blue lines) and integrated spectra (red lines) of **Pc-BP-Pc** (87  $\mu\text{M}$ ) in MCH at (a) 0.1, (b) 20, (c) 40, (d) 60, (e) 80, (f) 100, (g) 120, (h) 140, (i) 160, and (j) 180 MPa.

**Table S9. Fitting Parameters for Fluorescence Spectra of Pc-BP-Pc in Toluene**

| Pressure/MPa | a <sub>1</sub> | b <sub>1</sub> | c <sub>1</sub> | a <sub>2</sub> | b <sub>2</sub> | c <sub>2</sub> | a <sub>3</sub> | b <sub>3</sub> | c <sub>3</sub> |
|--------------|----------------|----------------|----------------|----------------|----------------|----------------|----------------|----------------|----------------|
| 0.1          | 7.696          | 15110          | 414.2          | 0.4788         | 14560          | 179.8          | 1.754          | 14050          | 633.1          |
| 20           | 7.301          | 15080          | 417.5          | 0.4175         | 14530          | 175.6          | 1.662          | 14020          | 631.4          |
| 40           | 7.026          | 15060          | 419.1          | 0.4161         | 14510          | 178.1          | 1.584          | 14000          | 622.6          |
| 60           | 6.840          | 15040          | 420.4          | 0.3640         | 14500          | 173.3          | 1.533          | 13990          | 639.9          |
| 80           | 6.711          | 15030          | 419.5          | 0.3572         | 14500          | 172.4          | 1.529          | 13980          | 649.3          |
| 100          | 6.594          | 15010          | 419.6          | 0.3247         | 14500          | 175.6          | 1.503          | 13970          | 660.5          |
| 120          | 6.512          | 15000          | 420.7          | 0.2888         | 14500          | 170.9          | 1.486          | 13970          | 677.1          |
| 140          | 6.488          | 14990          | 420.3          | 0.2734         | 14500          | 178.5          | 1.485          | 13960          | 684.2          |
| 160          | 6.591          | 14970          | 425.0          | 0.3331         | 14410          | 170.1          | 1.471          | 13910          | 645.3          |
| 180          | 6.672          | 14960          | 425.0          | 0.3437         | 14400          | 172.6          | 1.481          | 13900          | 641.6          |

**Table S10. Fitting Parameters for Fluorescence Spectra of Pc-BP-Pc in MCH**

| Pressure/MPa | a <sub>1</sub> | b <sub>1</sub> | c <sub>1</sub> | a <sub>2</sub> | b <sub>2</sub> | c <sub>2</sub> | a <sub>3</sub> | b <sub>3</sub> | c <sub>3</sub> |
|--------------|----------------|----------------|----------------|----------------|----------------|----------------|----------------|----------------|----------------|
| 0.1          | 10.580         | 15310          | 380.2          | 1.0260         | 14740          | 198.6          | 2.371          | 14120          | 509.0          |
| 20           | 10.130         | 15280          | 380.9          | 0.9928         | 14710          | 202.0          | 2.252          | 14130          | 506.3          |
| 40           | 9.963          | 15260          | 381.6          | 0.9673         | 14700          | 200.6          | 2.203          | 14120          | 509.0          |
| 60           | 9.798          | 15250          | 381.4          | 0.9651         | 14680          | 202.4          | 2.151          | 14100          | 506.5          |
| 80           | 9.694          | 15230          | 381.4          | 0.9496         | 14670          | 201.9          | 2.113          | 14090          | 507.7          |
| 100          | 9.632          | 15220          | 381.3          | 0.9492         | 14660          | 202.8          | 2.080          | 14070          | 511.9          |
| 120          | 9.786          | 15210          | 381.5          | 0.9499         | 14650          | 203.3          | 2.101          | 14060          | 514.4          |
| 140          | 9.837          | 15200          | 381.3          | 0.9546         | 14640          | 203.1          | 2.079          | 14050          | 514.8          |
| 160          | 9.890          | 15190          | 380.1          | 0.9829         | 14630          | 206.2          | 2.075          | 14040          | 514.3          |
| 180          | 9.920          | 15180          | 380.2          | 0.9824         | 14620          | 205.4          | 2.064          | 14030          | 517.0          |

**Table S11. Pressure Dependence of Correlated Triplet Pair Quantum Yields ( $\Phi_{TT}$ ) of Pc-BP-Pc<sup>a</sup>**

| Pressure/MPa | $\Phi_{TT}$ in toluene | $\Phi_{TT}$ in MCH |
|--------------|------------------------|--------------------|
| 0.1          | 0.955                  | 0.950              |
| 20           | 0.947                  | 0.943              |
| 40           | 0.955                  | 0.946              |
| 60           | 0.958                  | 0.951              |
| 80           | 0.957                  | 0.954              |
| 100          | 0.955                  | 0.947              |
| 120          | 0.961                  | 0.951              |
| 140          | 0.959                  | 0.959              |
| 160          | 0.956                  | 0.955              |
| 180          | 0.962                  | 0.947              |

<sup>a</sup>Measured at 298 K.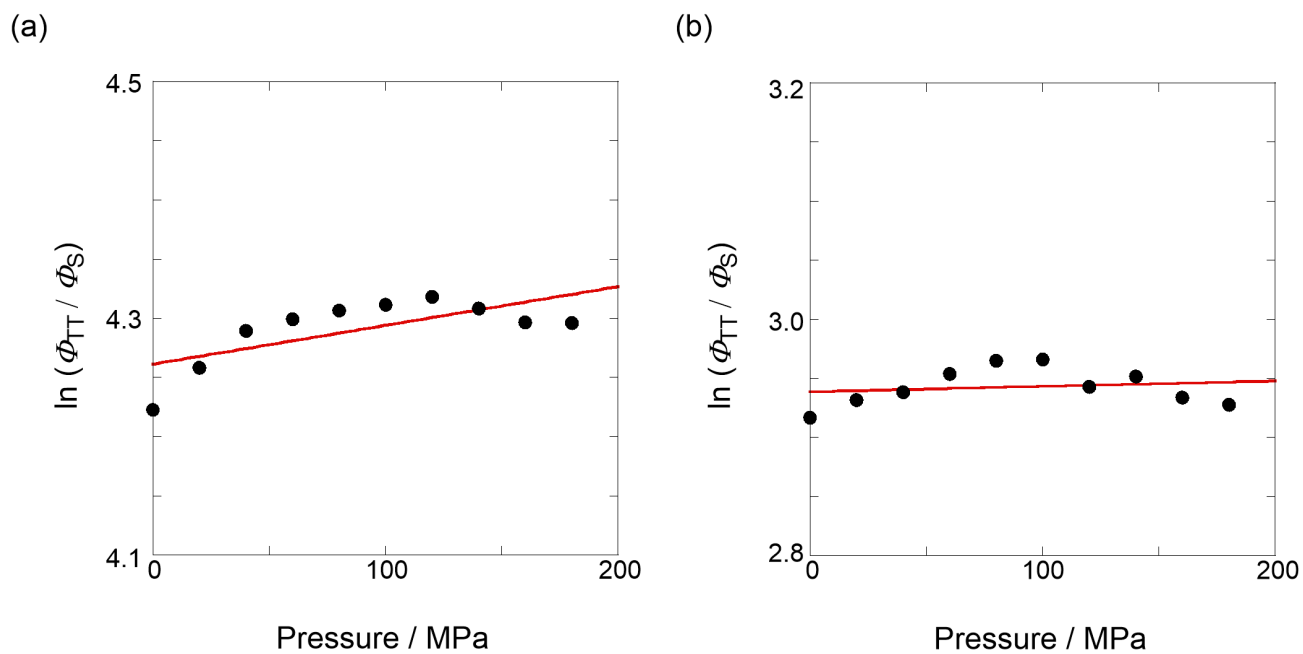**Figure S22.** Pressure dependence of relative abundance ratio ( $\Phi_{TT}/\Phi_S$ ) of Pc-BP-Pc in (a) toluene ( $r = 0.685$ ) and (b) MCH ( $r = 0.169$ ) at room temperature.

**Table S12. Triplet Quantum Yields ( $\Phi_T$ ) of Pc-BP-Pc in Toluene under Hydrostatic Pressure**

| Pressure/MPa | $\Delta A_{\text{Pc-BP-Pc}}^a$ | $\Delta A_{\text{ZnTPP}}^b$ | $A_{\text{Pc-BP-Pc}}$ | $A_{\text{ZnTPP}}$ | $\Phi_{T,\text{Pc-BP-Pc}}$ |
|--------------|--------------------------------|-----------------------------|-----------------------|--------------------|----------------------------|
| 0.1          | 0.026                          | 0.078                       | 0.054 <sup>a</sup>    | 0.254 <sup>b</sup> | 1.76                       |
| 20           | 0.025                          | 0.077                       | 0.055 <sup>c</sup>    | 0.260 <sup>d</sup> | 1.70                       |
| 40           | 0.025                          | 0.075                       | 0.056 <sup>c</sup>    | 0.259 <sup>d</sup> | 1.69                       |
| 60           | 0.024                          | 0.072                       | 0.056 <sup>c</sup>    | 0.258 <sup>d</sup> | 1.67                       |
| 80           | 0.022                          | 0.074                       | 0.057 <sup>c</sup>    | 0.258 <sup>d</sup> | 1.50                       |
| 100          | 0.021                          | 0.071                       | 0.057 <sup>c</sup>    | 0.258 <sup>d</sup> | 1.48                       |
| 120          | 0.020                          | 0.070                       | 0.059 <sup>c</sup>    | 0.257 <sup>d</sup> | 1.40                       |
| 140          | 0.019                          | 0.069                       | 0.059 <sup>c</sup>    | 0.259 <sup>d</sup> | 1.37                       |
| 160          | 0.018                          | 0.070                       | 0.059 <sup>c</sup>    | 0.258 <sup>d</sup> | 1.24                       |
| 180          | 0.017                          | 0.069                       | 0.059 <sup>c</sup>    | 0.252 <sup>d</sup> | 1.15                       |

<sup>a</sup>Pc-BP-Pc (81  $\mu\text{M}$ ) in toluene. <sup>b</sup>ZnTPP (247  $\mu\text{M}$ ) in toluene. <sup>c</sup>Corrected by Figure 2a. <sup>d</sup>Corrected by Figure S23b.

**Table S13. Triplet Quantum Yields ( $\Phi_T$ ) of Pc-BP-Pc in MCH under Hydrostatic Pressure**

| Pressure/MPa | $\Delta A_{\text{Pc-BP-Pc}}^a$ | $\Delta A_{\text{ZnTPP}}^b$ | $A_{\text{Pc-BP-Pc}}$ | $A_{\text{ZnTPP}}$ | $\Phi_{T,\text{Pc-BP-Pc}}$ |
|--------------|--------------------------------|-----------------------------|-----------------------|--------------------|----------------------------|
| 0.1          | 0.028                          | 0.078                       | 0.090 <sup>a</sup>    | 0.254 <sup>b</sup> | 1.12                       |
| 20           | 0.026                          | 0.077                       | 0.090 <sup>c</sup>    | 0.260 <sup>d</sup> | 1.10                       |
| 40           | 0.026                          | 0.075                       | 0.091 <sup>c</sup>    | 0.259 <sup>d</sup> | 1.08                       |
| 60           | 0.025                          | 0.072                       | 0.093 <sup>c</sup>    | 0.258 <sup>d</sup> | 1.05                       |
| 80           | 0.023                          | 0.074                       | 0.094 <sup>c</sup>    | 0.258 <sup>d</sup> | 0.95                       |
| 100          | 0.022                          | 0.071                       | 0.098 <sup>c</sup>    | 0.258 <sup>d</sup> | 0.92                       |
| 120          | 0.022                          | 0.070                       | 0.098 <sup>c</sup>    | 0.257 <sup>d</sup> | 0.91                       |
| 140          | 0.021                          | 0.069                       | 0.100 <sup>c</sup>    | 0.259 <sup>d</sup> | 0.88                       |
| 160          | 0.020                          | 0.070                       | 0.100 <sup>c</sup>    | 0.258 <sup>d</sup> | 0.81                       |
| 180          | 0.018                          | 0.069                       | 0.101 <sup>c</sup>    | 0.252 <sup>d</sup> | 0.72                       |

<sup>a</sup>Pc-BP-Pc (84  $\mu\text{M}$ ) in MCH. <sup>b</sup>ZnTPP (247  $\mu\text{M}$ ) in toluene. <sup>c</sup>Corrected by Figure S5a. <sup>d</sup>Corrected by Figure S23b.

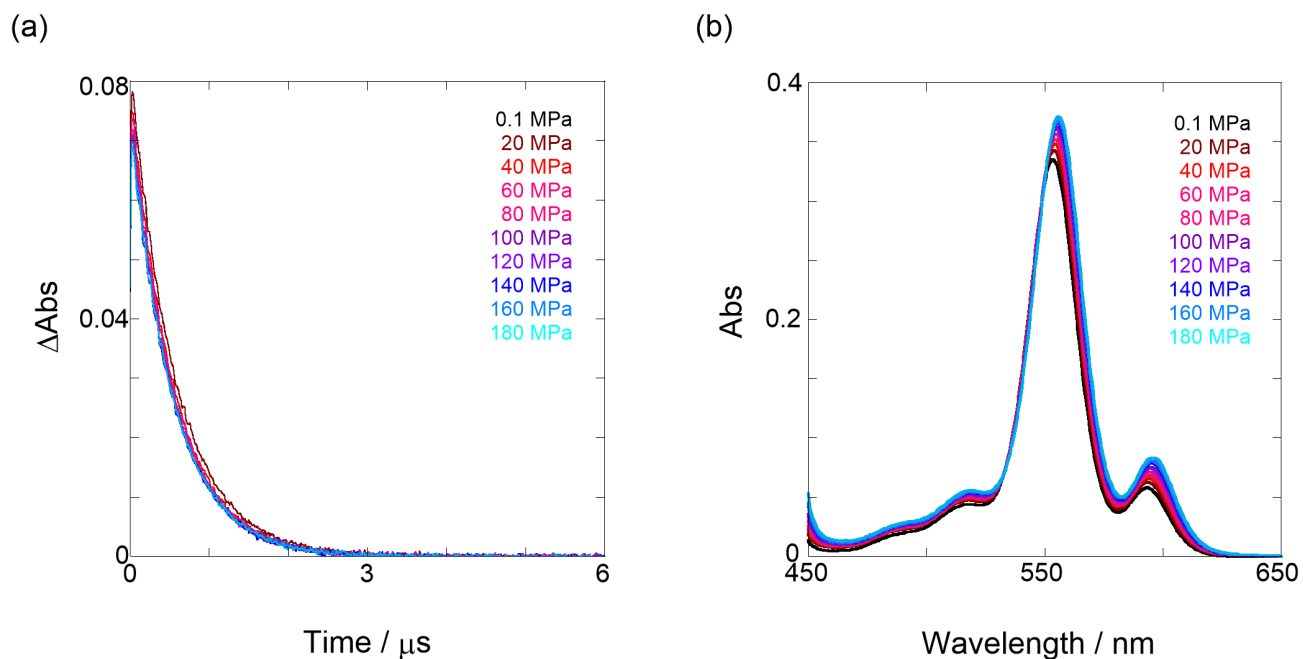

**Figure S23.** (a) nsTA decay profiles ( $\lambda_{\text{ex}} = 532 \text{ nm}$ ,  $\lambda_{\text{obs}} = 470 \text{ nm}$ ) and (b) UV/vis spectra of **ZnTPP** (113  $\mu\text{M}$ ) in toluene at room temperature at 0.1, 20, 40, 60, 80, 100, 120, 140, 160, and 180 MPa (from black to sky blue), measured in a high-pressure cell.

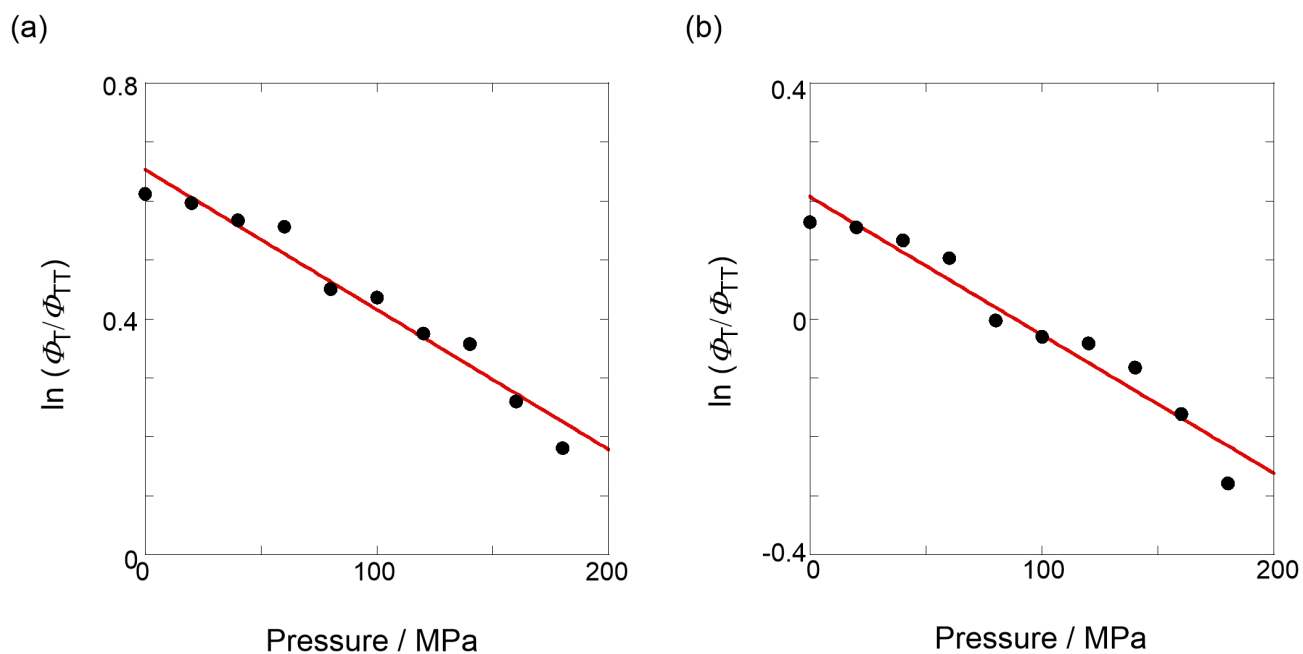

**Figure S24.** Pressure dependence of relative abundance ratio ( $\Phi_T/\Phi_{TT}$ ) of **Pc-BP-Pc** in (a) toluene ( $r = 0.979$ ) and (b) MCH ( $r = 0.972$ ) at room temperature.

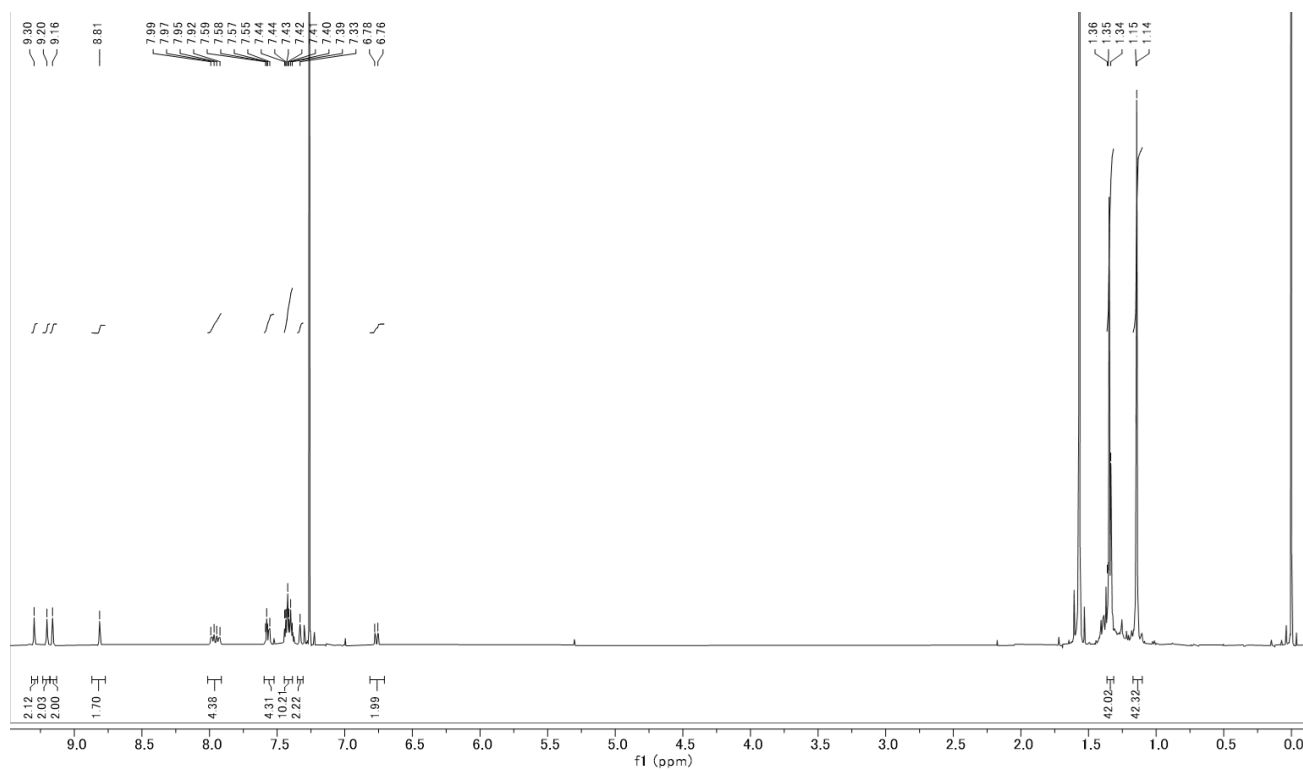

**Figure S25.**  $^1\text{H}$  NMR spectrum of **Pc-BP-Pc** in  $\text{CDCl}_3$ .

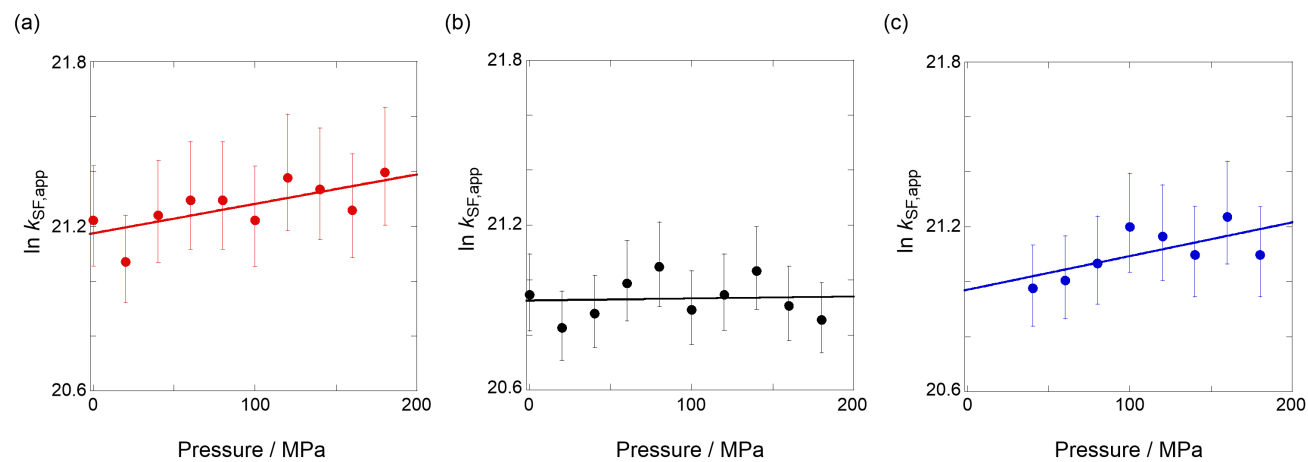

**Figure S26.** Pressure dependence of SF rate constants ( $k_{\text{SF,app}}$ ) of **Pc-BP-Pc** in toluene (red,  $r = 0.655$ ), THF (blue,  $r = 0.706$ ), and MCH (black,  $r = 0.059$ ) at room temperature.

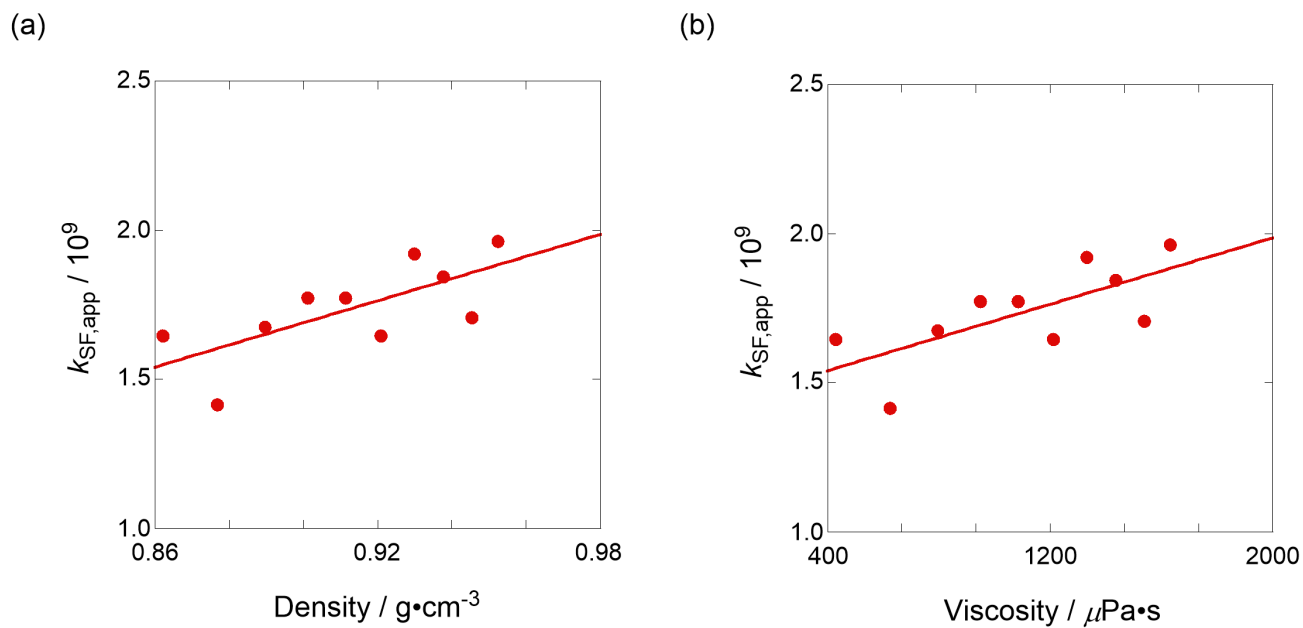

**Figure S27.** Pressure dependence of SF rate constants ( $k_{SF,app}$ ) of Pc-BP-Pc as a function of (a) toluene density and (b) toluene viscosity at room temperature.
